# Supplementary material
Source: PubMed Central journal article supplement (PMC5926195)
Supplement: NIHMS956753-supplement-Supporting_Information.pdf [file NIHMS956753-supplement-Supporting_Information.pdf]

# Supporting Information

## Peptide-Binding Nanoparticle Materials with Tailored Recognition sites for Basic Peptides

Shixin Fa and Yan Zhao\*

*Department of Chemistry, Iowa State University, Ames, Iowa 50011-3111, USA*

### *Table of Contents*

|                                                                 |    |
|-----------------------------------------------------------------|----|
| General Method.....                                             | 3  |
| Chart S1. Structures of other oligopeptides used in study. .... | 4  |
| Characterization of MINPs .....                                 | 5  |
| Figure S1 .....                                                 | 5  |
| Figure S2.....                                                  | 5  |
| Figure S3.....                                                  | 6  |
| Figure S4.....                                                  | 6  |
| Figure S5.....                                                  | 7  |
| Figure S6.....                                                  | 7  |
| Figure S7.....                                                  | 8  |
| Figure S8.....                                                  | 8  |
| Figure S9.....                                                  | 9  |
| Figure S10.....                                                 | 10 |
| Figure S11.....                                                 | 10 |
| Figure S12.....                                                 | 10 |
| Fluorescence titration experiments .....                        | 11 |
| Figure S13.....                                                 | 11 |
| Figure S14.....                                                 | 11 |

|                 |    |
|-----------------|----|
| Figure S15..... | 12 |
| Figure S16..... | 12 |
| Figure S17..... | 13 |
| Figure S18..... | 13 |
| Figure S19..... | 14 |
| Figure S20..... | 14 |
| Figure S21..... | 15 |
| Figure S22..... | 15 |
| Figure S23..... | 16 |
| Figure S24..... | 16 |
| Figure S25..... | 17 |
| Figure S26..... | 17 |
| Figure S27..... | 18 |
| Figure S28..... | 18 |
| Figure S29..... | 19 |
| Table S1.....   | 19 |
| Figure S30..... | 20 |
| Figure S31..... | 20 |
| Figure S32..... | 21 |
| Figure S33..... | 21 |
| Figure S34..... | 22 |
| Figure S35..... | 22 |
| Figure S36..... | 23 |
| Figure S37..... | 23 |
| Figure S38..... | 24 |
| Figure S39..... | 24 |
| Figure S40..... | 25 |
| Figure S41..... | 25 |
| Figure S42..... | 26 |
| Figure S43..... | 26 |
| Figure S44..... | 27 |
| Figure S45..... | 27 |
| Figure S46..... | 28 |
| Figure S47..... | 28 |
| Figure S48..... | 29 |

|                                                   |    |
|---------------------------------------------------|----|
| Figure S49.....                                   | 29 |
| ITC titration experiments.....                    | 30 |
| Figure S50.....                                   | 30 |
| Figure S51.....                                   | 31 |
| Figure S52.....                                   | 32 |
| Figure S53.....                                   | 33 |
| Figure S54.....                                   | 34 |
| Figure S55.....                                   | 34 |
| <sup>1</sup> H & <sup>13</sup> C NMR spectra..... | 35 |

### ***General Method***

Biological peptides PKKKRKV, KKALRRQETVDAL, RVLSFIKGTK and LRRASLG were purchased from GenScript USA Inc., and reconstituted according to the instructions. Other oligopeptides were purchased from GL Biochem (Shanghai) Ltd. All organic solvents and reagents were of ACS-certified grade or higher grade, and were purchased from commercial suppliers. <sup>1</sup>H and <sup>13</sup>C NMR spectra were recorded on a Varian VXR-400 spectrometer. ESI-MS mass was recorded on Shimadzu LCMS-2010 mass spectrometer. Dynamic light scattering (DLS) data were recorded at 25 °C using PDDLS/CoolBatch 90T with PD2000DLS+ instrument. Transmission electron microscopy (TEM) was carried out using a TECNAI G2 F20 operated at 200 kV. Fluorescent titrations and Job's plot experiments were taken at ambient temperature on a Varian Cary Eclipse Fluorescence spectrophotometer. The binding constants were calculated by curve fitting using KaleidaGraph. Isothermal titration calorimetry (ITC) was performed using a MicroCal VP-ITC Microcalorimeter with Origin 7 software and VPViewer2000 (GE Healthcare, Northampton, MA). For the TEM imaging, 5 mg of MINP (KWW) was dissolved in 1 mL of Millipore water and the solution was ultrasonicated for 1 min. A microsyringe was used to load one small drop of the above solution onto a TEM copper grid covered with carbon film. The sample was left to dry at room temperature overnight. The sample was analyzed on a TECNAI G2 F20 instrument, operating at 200 kV.

**Chart S1.** Structures of other oligopeptides used in study.

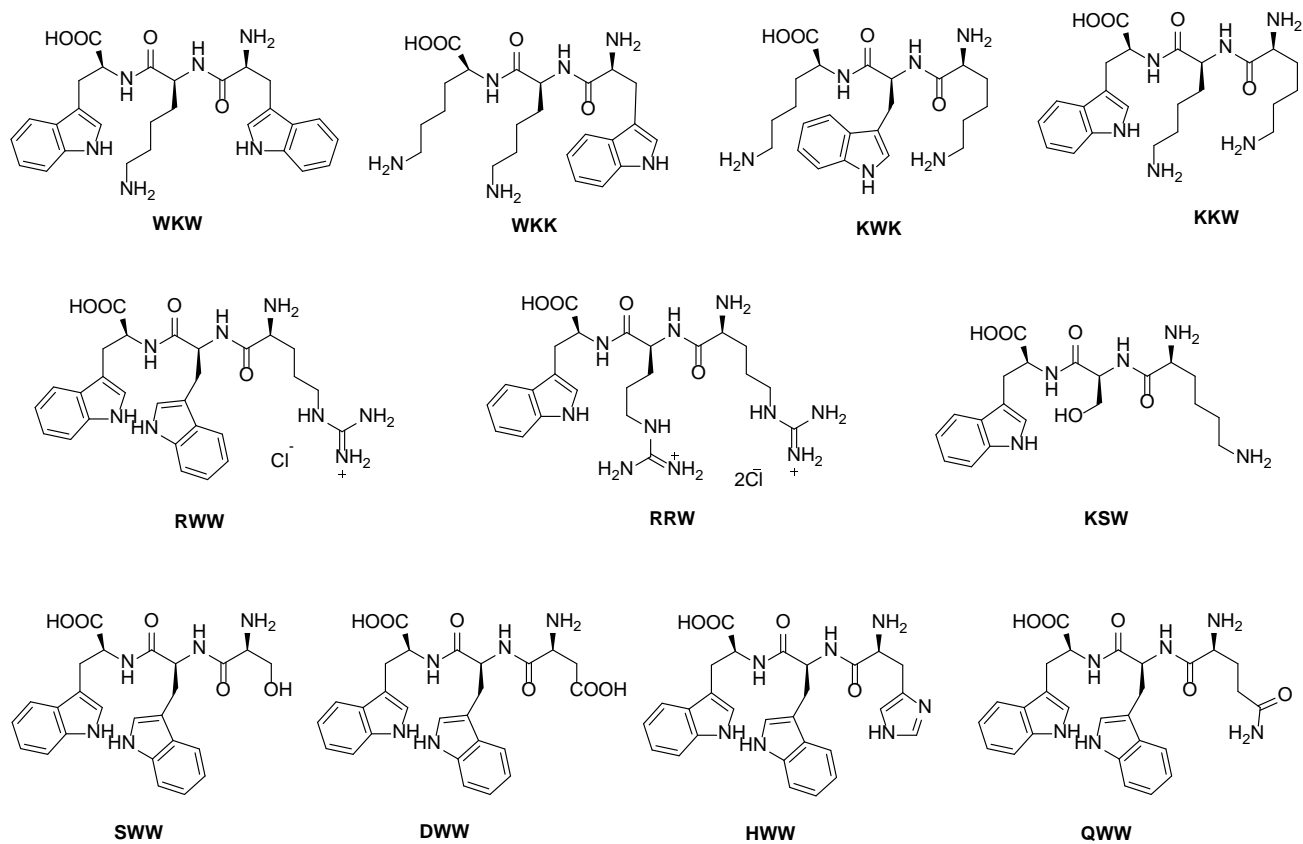

## Characterization of MINPs

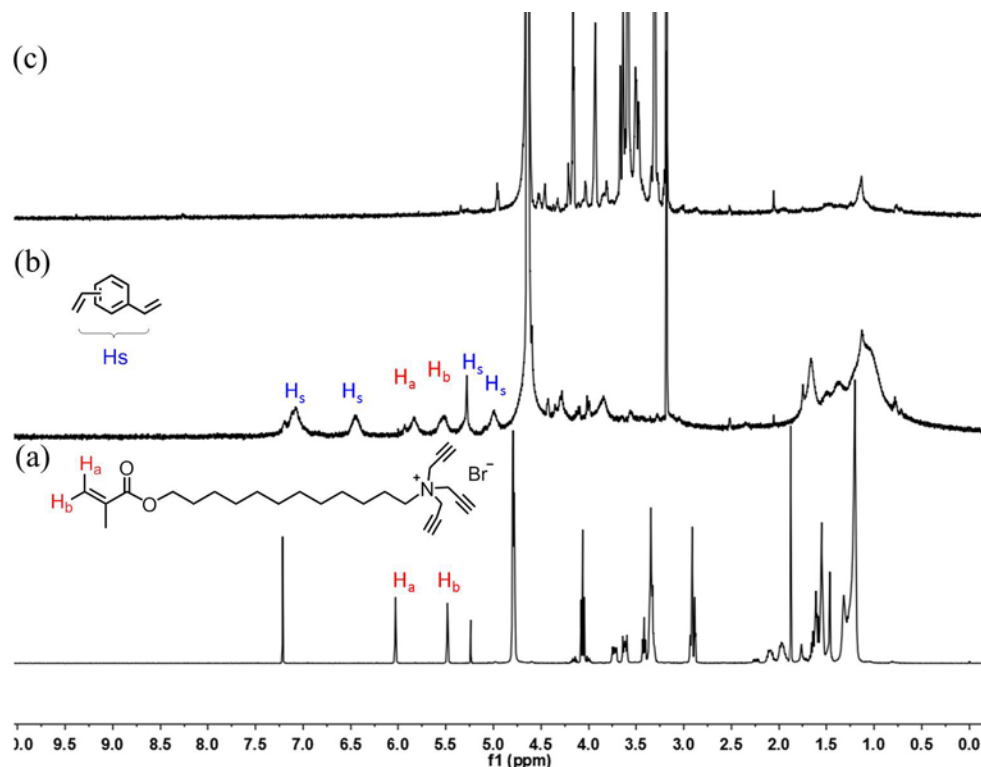

**Figure S1.** <sup>1</sup>H NMR spectra of (a) **1** in CDCl<sub>3</sub>, (b) alkynyl-SCM in D<sub>2</sub>O, and (c) MINP(KWW) without functional monomer in D<sub>2</sub>O.

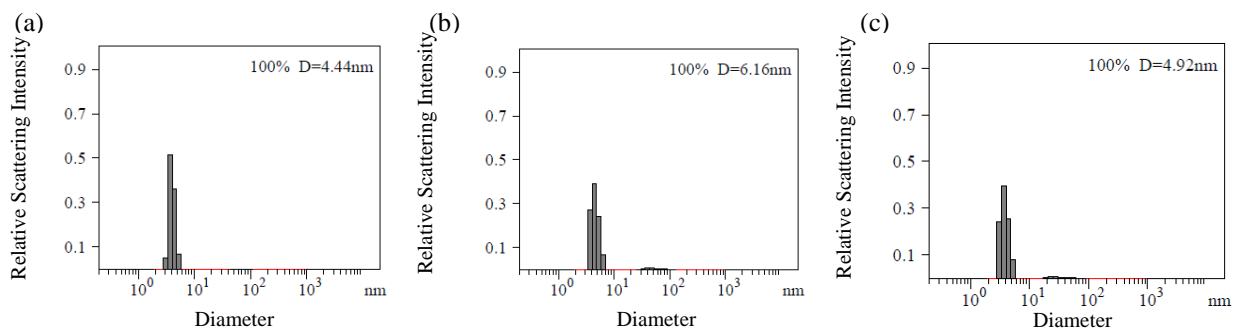

**Figure S2.** Distribution of the hydrodynamic diameters of the nanoparticles in water as determined by DLS for (a) alkynyl-SCM, (b) surface-functionalized SCM, and (c) MINP(KWW) without functional monomer in water.

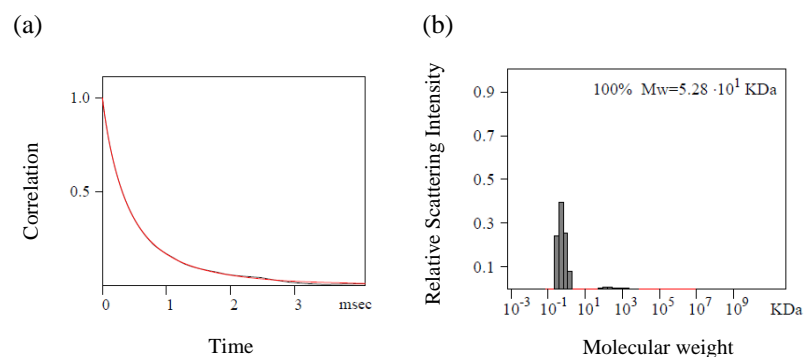

**Figure S3.** The correlation curve and the distribution of the molecular weight for MINP(KWW) from the DLS. The PRECISION DECONVOLVE program assumes the intensity of scattering is proportional to the mass of the particle squared. If each unit of building block for the MINP(KWW) is assumed to contain one molecule of compound **1** (MW = 465 g/mol), 1.2 molecules of compound **2** (MW = 172 g/mol), one molecule of DVB (MW = 130 g/mol) and 0.8 molecules of compound **3** (MW = 264 g/mol), the molecular weight of MINP(KWW) translates to 52 [= 52800 / (465 + 1.2×172 + 130 + 0.8×264)] of such units.

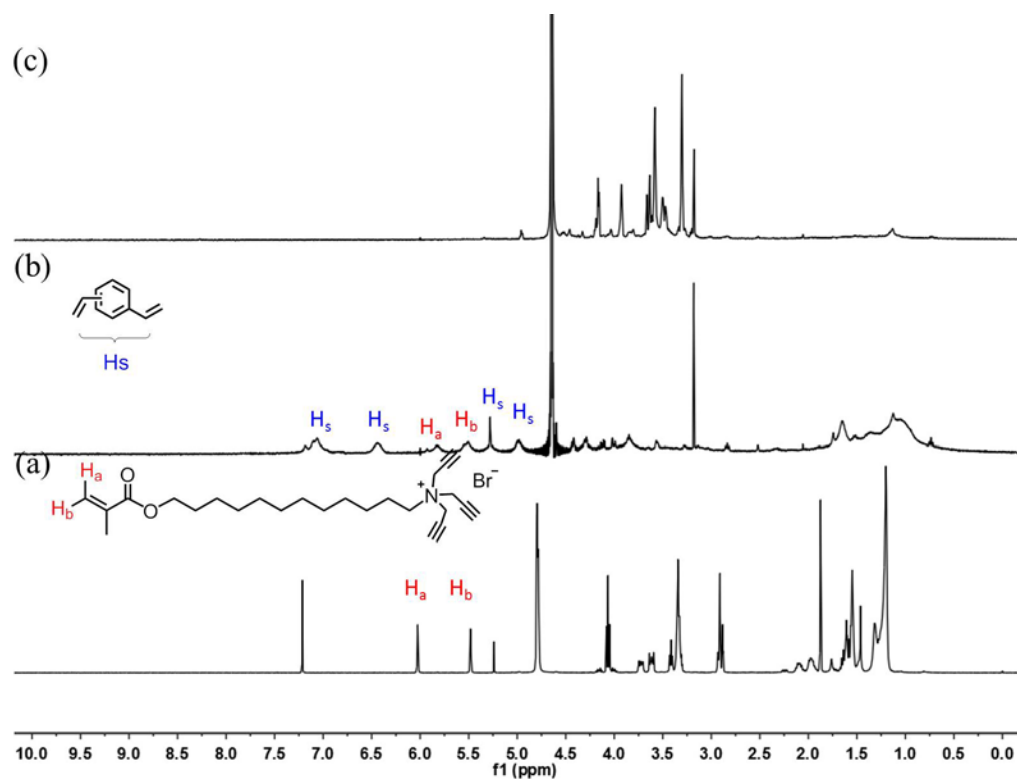

**Figure S4.** <sup>1</sup>H NMR spectra of (a) **1** in CDCl<sub>3</sub>, (b) alkyneyl-SCM in D<sub>2</sub>O, and (c) MINP(KWW) with FM **4** (1:1) in D<sub>2</sub>O.

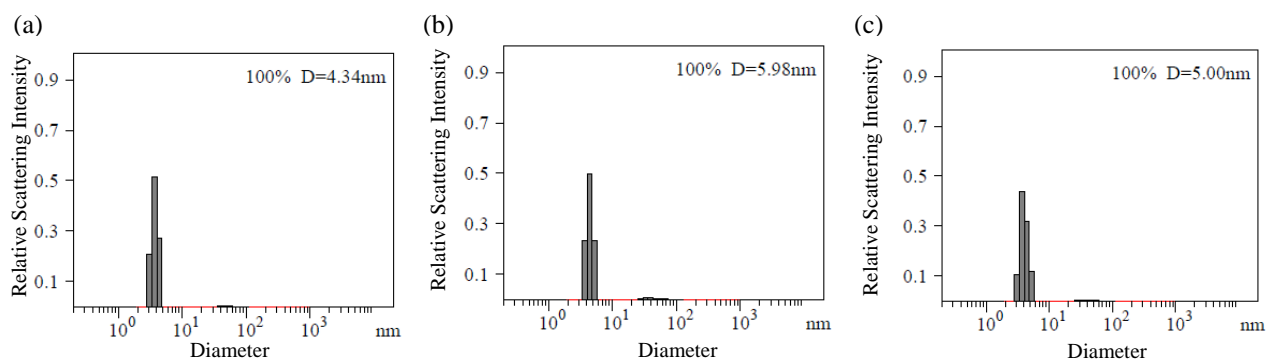

**Figure S5.** Distribution of the hydrodynamic diameters of the nanoparticles in water as determined by DLS for (a) alkynyl-SCM, (b) surface-functionalized SCM, and (c) MINP(KWW) with FM 4 (1:1) in water.

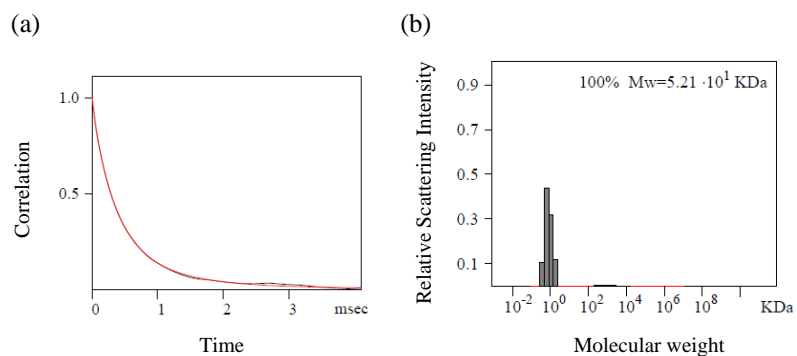

**Figure S6.** The correlation curve and the distribution of the molecular weight for MINP(KWW) with FM 4 (1:1) from the DLS. The PRECISION DECONVOLVE program assumes the intensity of scattering is proportional to the mass of the particle squared. If each unit of building block for the MINP(KWW) with FM 4 (1:1) is assumed to contain one molecule of compound **1** (MW = 465 g/mol), 1.2 molecules of compound **2** (MW = 172 g/mol), one molecule of DVB (MW = 130 g/mol), 0.8 molecules of compound **3** (MW = 264 g/mol), and 0.02 molecules of FM 4 (MW = 595 g/mol), the molecular weight of MINP(KWW) with FM 4 (1:1) translates to 51 [= 52100 / (465 + 1.2×172 + 130 + 0.8×264 + 0.02×595)] of such units.

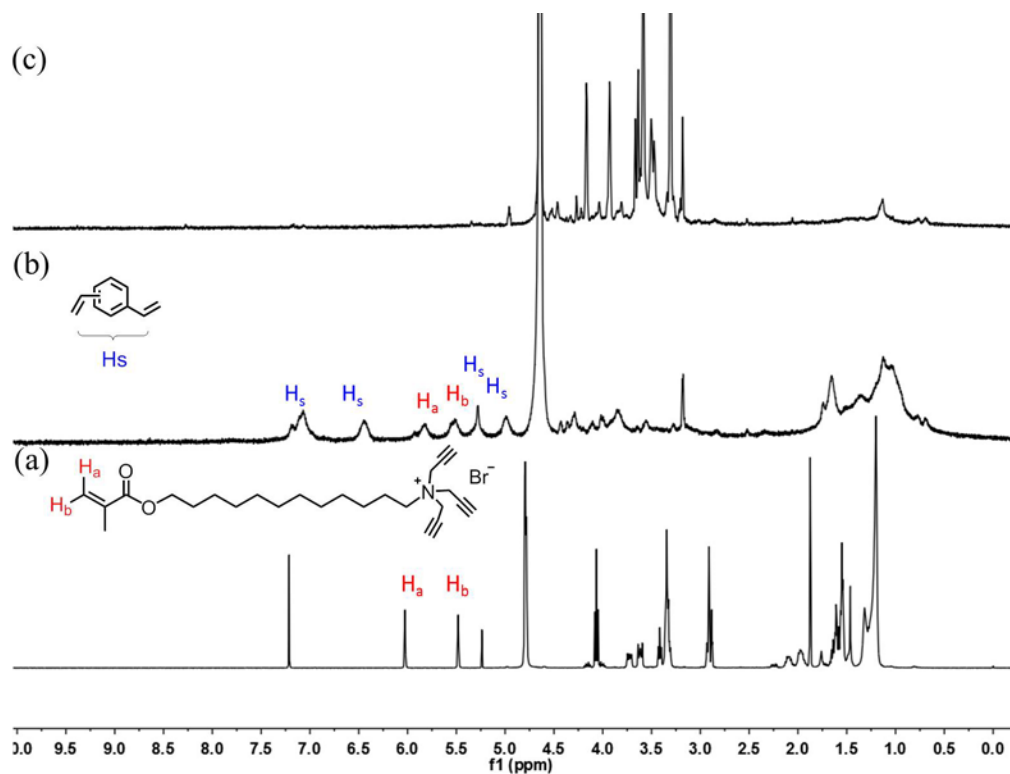

**Figure S7.** <sup>1</sup>H NMR spectra of (a) **1** in CDCl<sub>3</sub>, (b) alkyne-SCM in D<sub>2</sub>O, and (c) MINP(KWW) with FM **4** (1:2) in D<sub>2</sub>O.

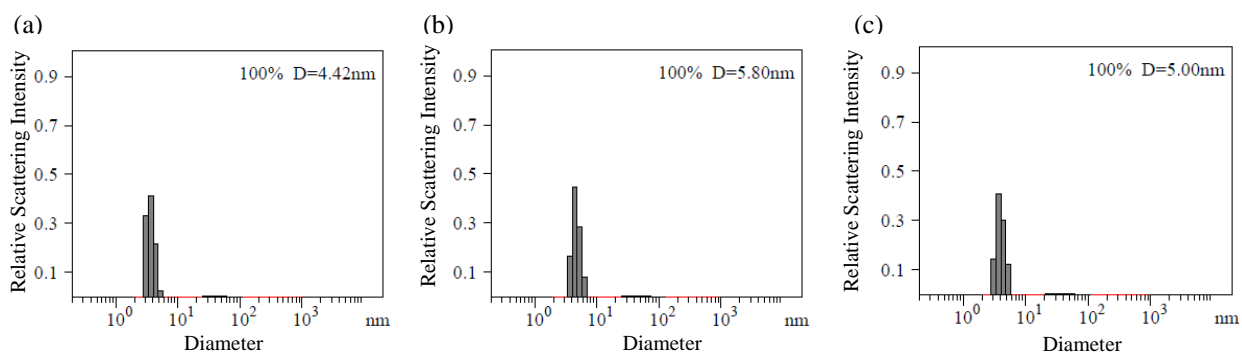

**Figure S8.** Distribution of the hydrodynamic diameters of the nanoparticles in water as determined by DLS for (a) alkyne-SCM, (b) surface-functionalized SCM, and (c) MINP(KWW) with FM **4** (1:2) in water.



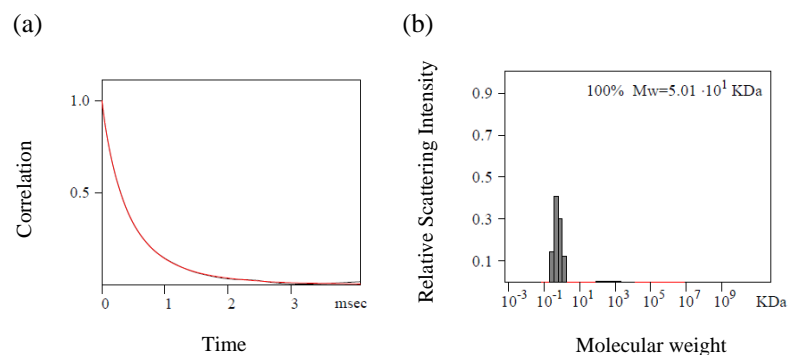

**Figure S9.** The correlation curve and the distribution of the molecular weight for MINP(KWW) with FM 4 (1:2) from the DLS. The PRECISION DECONVOLVE program assumes the intensity of scattering is proportional to the mass of the particle squared. If each unit of building block for the MINP(KWW) with FM 4 (1:2) is assumed to contain one molecule of compound 1 (MW = 465 g/mol), 1.2 molecules of compound 2 (MW = 172 g/mol), one molecule of DVB (MW = 130 g/mol), 0.8 molecules of compound 3 (MW = 264 g/mol), and 0.06 molecules of FM 4 (MW = 595 g/mol), the molecular weight of MINP(KWW) with FM 4 (1:2) translates to 48 [= 50100 / (465 + 1.2×172 + 130 + 0.8×264 + 0.04×595)] of such units.

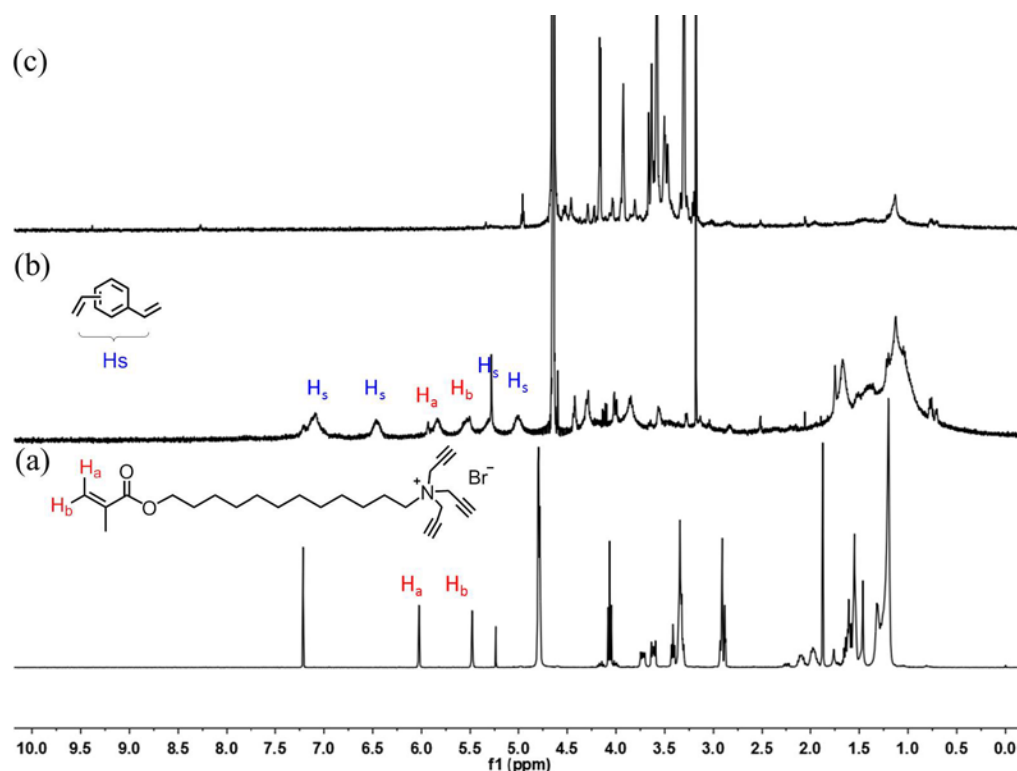

**Figure S10.**  $^1\text{H}$  NMR spectra of (a) **1** in  $\text{CDCl}_3$ , (b) alkylnyl-SCM in  $\text{D}_2\text{O}$ , and (c) MINP(KWW) with FM **4** (1:3) in  $\text{D}_2\text{O}$ .

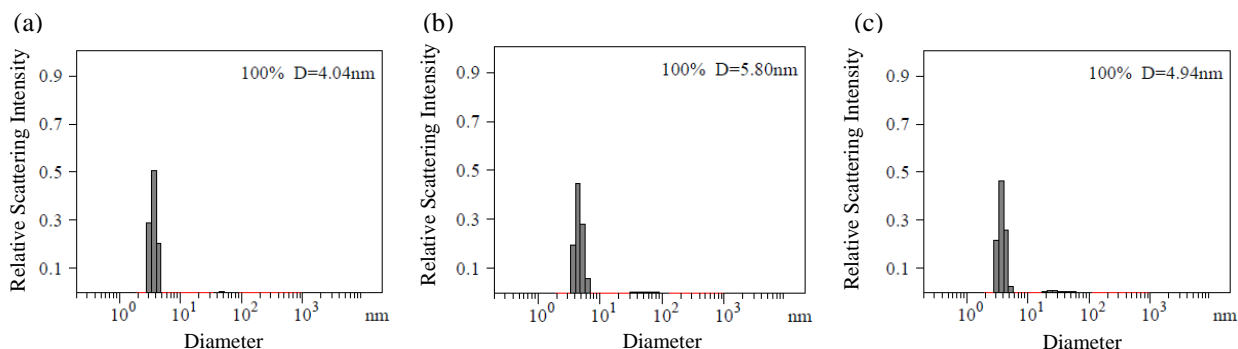

**Figure S11.** Distribution of the hydrodynamic diameters of the nanoparticles in water as determined by DLS for (a) alkylnyl-SCM, (b) surface-functionalized SCM, and (c) MINP(KWW) with FM **4** (1:3) in water.

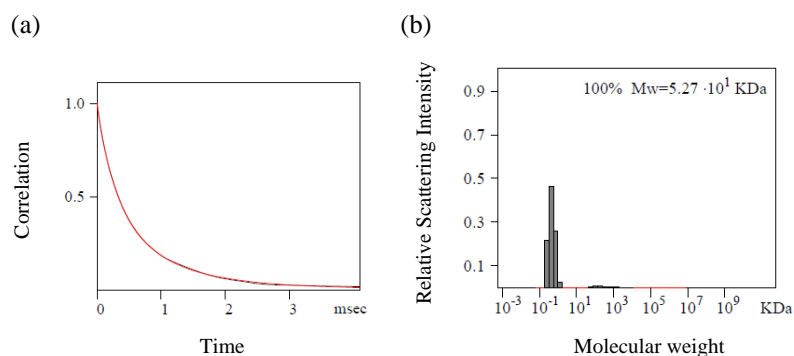

**Figure S12.** The correlation curve and the distribution of the molecular weight for MINP(KWW) with FM **4** (1:3) from the DLS. The PRECISION DECONVOLVE program assumes the intensity of scattering is proportional to the mass of the particle squared. If each unit of building block for the MINP(c-Myc) with FM **2** (1:7.5) is assumed to contain one molecule of compound **1** (MW = 465 g/mol), 1.2 molecules of compound **2** (MW = 172 g/mol), one molecule of DVB (MW = 130 g/mol), 0.8 molecules of compound **3** (MW = 264 g/mol), and 0.06 molecules of FM **4** (MW = 595 g/mol), the molecular weight of MINP(KWW) with FM **4** (1:3) translates to 50 [= 52700 / (465 + 1.2 $\times$ 172 + 130 + 0.8 $\times$ 264 + 0.06 $\times$ 595)] of such units.

## Fluorescence titration experiments

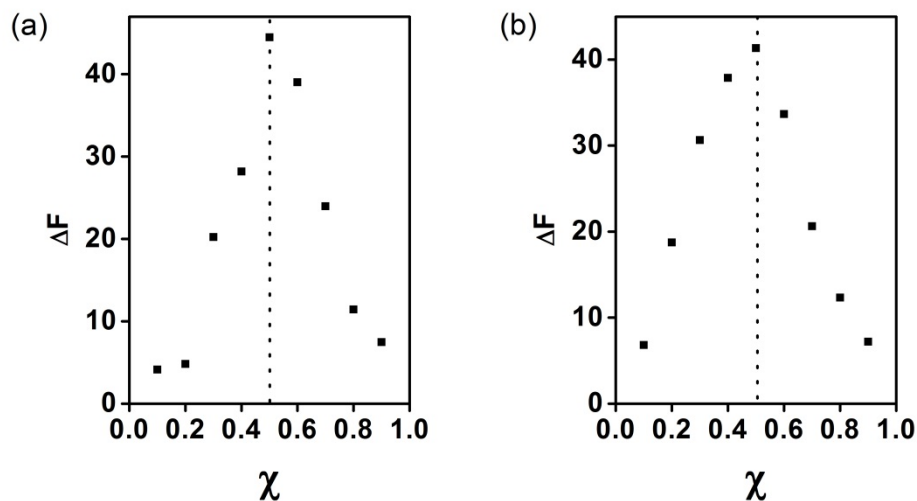

**Figure S13.** Job's plots for KWW with MINP(KWW) prepared (a) without FM and (b) with 2 equiv FM 4. The total concentration of MINP and the guest was 10  $\mu\text{M}$ .  $\chi = [\text{Host}]/\{[\text{Host}] + [\text{Guest}]\}$

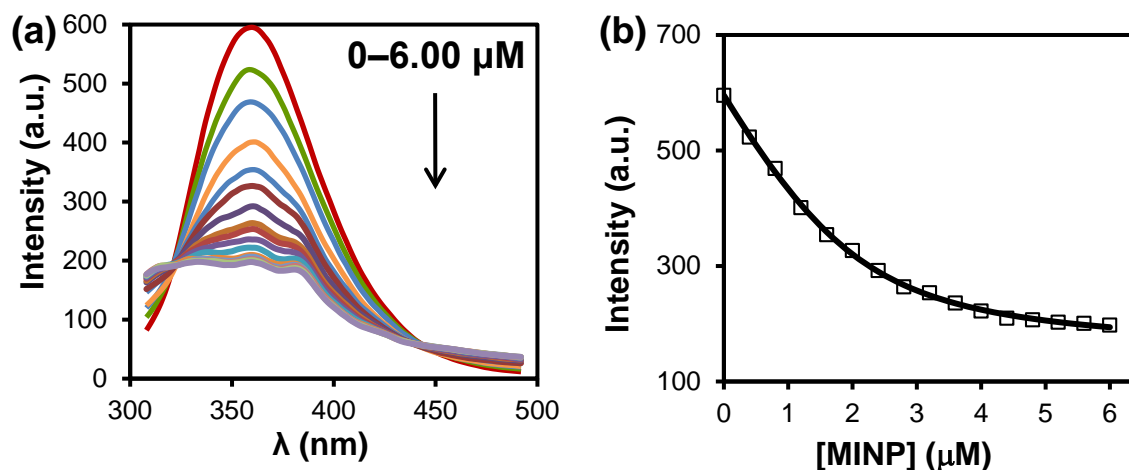

**Figure S14.** (a) Fluorescence emission spectra ( $\lambda_{\text{ex}} = 280 \text{ nm}$ ) of peptide KWW (2.0  $\mu\text{M}$ ) upon addition of different concentrations of MINP(KWW) in water. (b) Nonlinear least squares fitting of the emission intensity of peptide KWW at 360 nm to a 1:1 binding isotherm. The data correspond to entry 1 in Table 1.

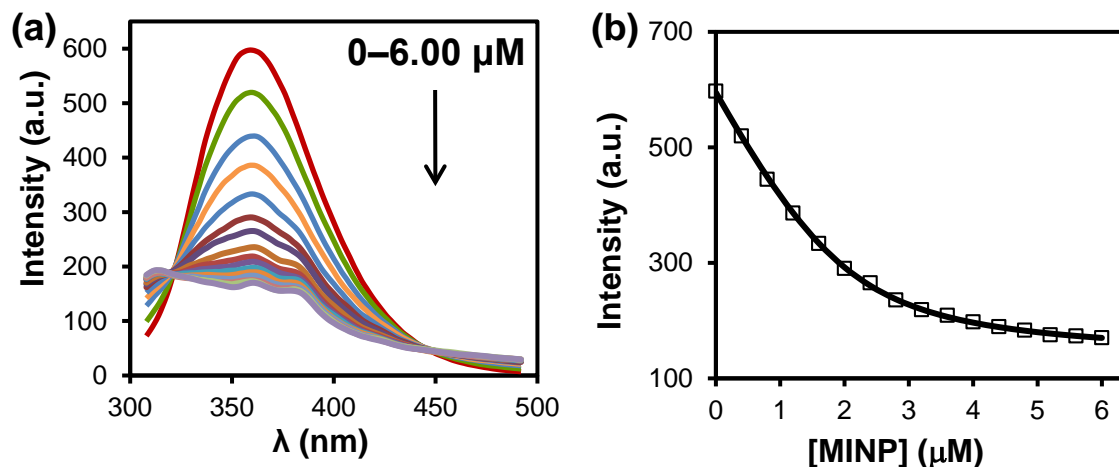

**Figure S15.** (a) Fluorescence emission spectra ( $\lambda_{\text{ex}} = 280 \text{ nm}$ ) of peptide KWW ( $2.0 \mu\text{M}$ ) upon addition of different concentrations of MINP(KWW) with FM 4 (1:1) in water. (b) Nonlinear least squares fitting of the emission intensity of peptide KWW at 360 nm to a 1:1 binding isotherm. The data correspond to entry 2 in Table 1.

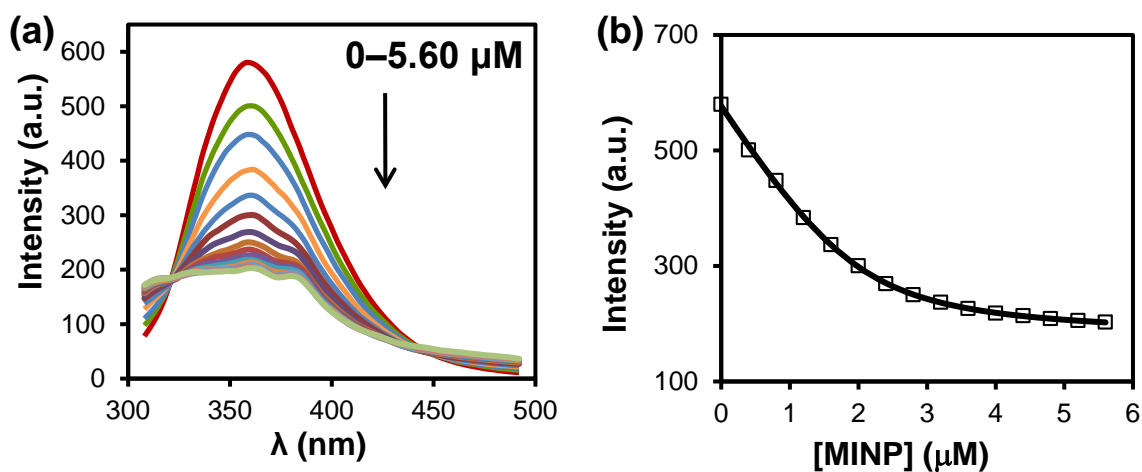

**Figure S16.** (a) Fluorescence emission spectra ( $\lambda_{\text{ex}} = 280 \text{ nm}$ ) of peptide KWW ( $2.0 \mu\text{M}$ ) upon addition of different concentrations of MINP(KWW) with FM 4 (1:2) in water. (b) Nonlinear least squares fitting of the emission intensity of peptide KWW at 360 nm to a 1:1 binding isotherm. The data correspond to entry 3 in Table 1.

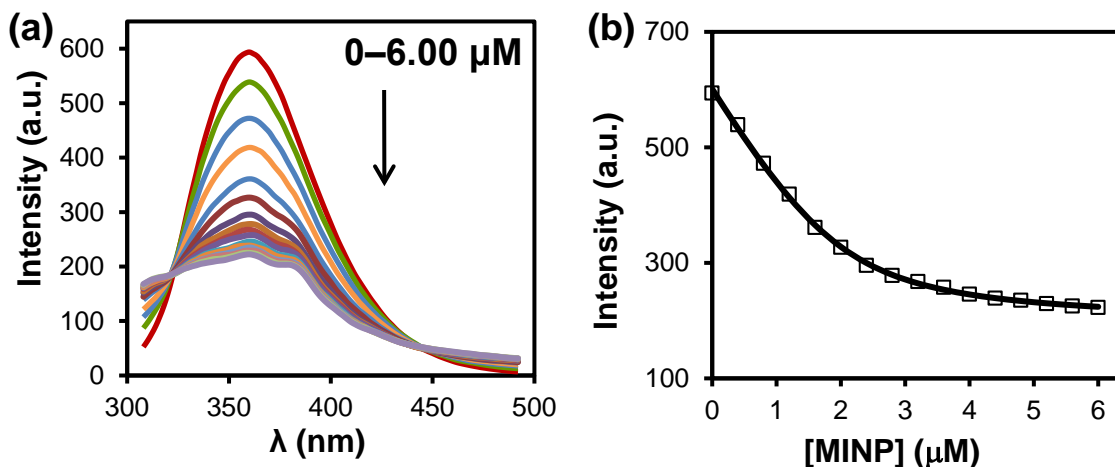

**Figure S17.** (a) Fluorescence emission spectra ( $\lambda_{\text{ex}} = 280 \text{ nm}$ ) of peptide KWW ( $2.0 \mu\text{M}$ ) upon addition of different concentrations of MINP(KWW) with FM 4 (1:3) in water. (b) Nonlinear least squares fitting of the emission intensity of peptide KWW at 360 nm to a 1:1 binding isotherm. The data correspond to entry 4 in Table 1.

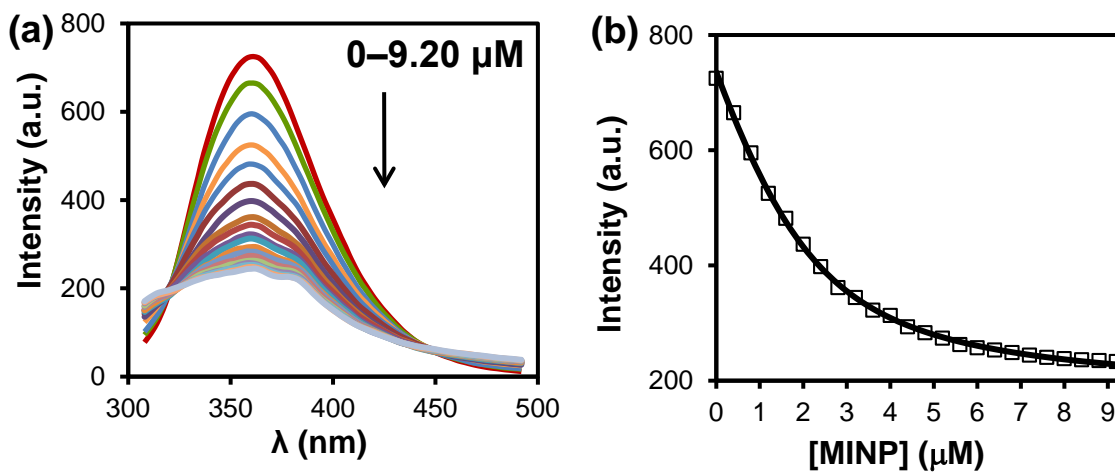

**Figure S18.** (a) Fluorescence emission spectra ( $\lambda_{\text{ex}} = 280 \text{ nm}$ ) of peptide WKW ( $2.0 \mu\text{M}$ ) upon addition of different concentrations of MINP(WKW) in water. (b) Nonlinear least squares fitting of the emission intensity of peptide WKW at 360 nm to a 1:1 binding isotherm. The data correspond to entry 11 in Table 1.

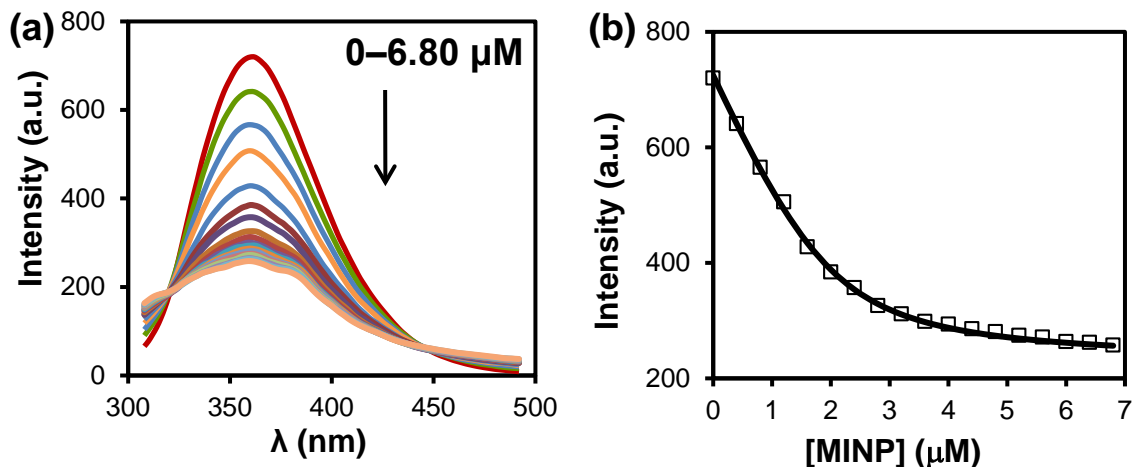

**Figure S19.** (a) Fluorescence emission spectra ( $\lambda_{\text{ex}} = 280 \text{ nm}$ ) of peptide WKW ( $2.0 \mu\text{M}$ ) upon addition of different concentrations of MINP(WKW) with FM 4 (1:2) in water. (b) Nonlinear least squares fitting of the emission intensity of peptide WKW at 360 nm to a 1:1 binding isotherm. The data correspond to entry 12 in Table 1.

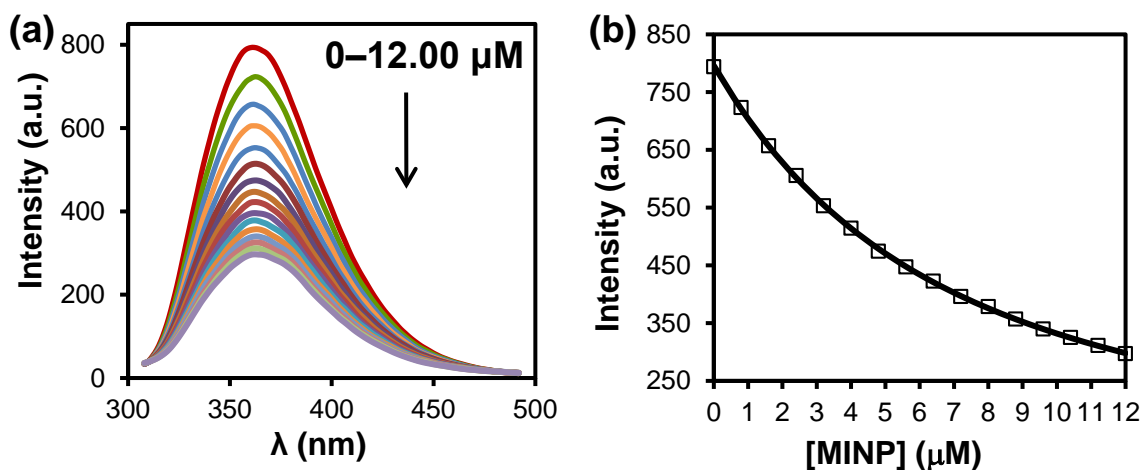

**Figure S20.** (a) Fluorescence emission spectra ( $\lambda_{\text{ex}} = 280 \text{ nm}$ ) of peptide KKW ( $2.0 \mu\text{M}$ ) upon addition of different concentrations of MINP(KKW) in water. (b) Nonlinear least squares fitting of the emission intensity of peptide KKW at 362 nm to a 1:1 binding isotherm. The data correspond to entry 13 in Table 1.

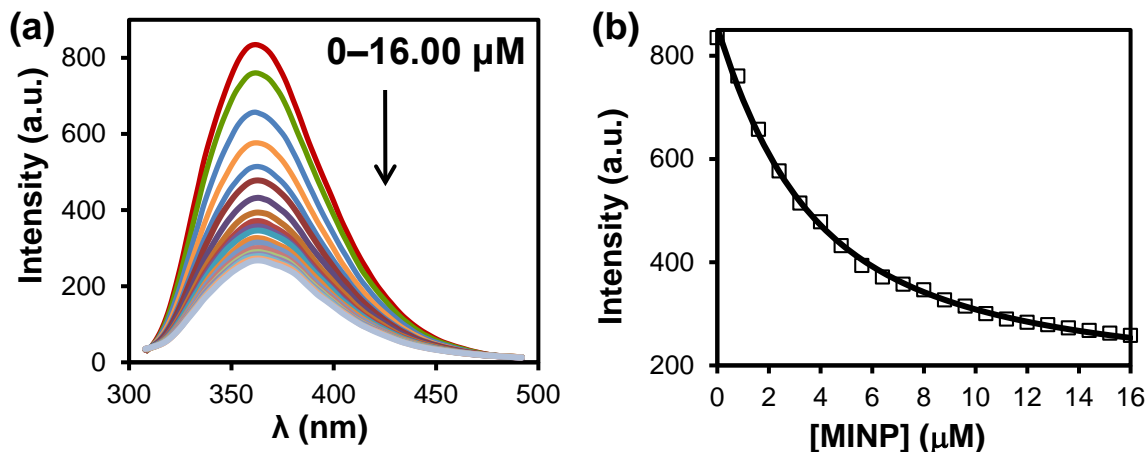

**Figure S21.** (a) Fluorescence emission spectra ( $\lambda_{\text{ex}} = 280 \text{ nm}$ ) of peptide KKW ( $2.0 \mu\text{M}$ ) upon addition of different concentrations of MINP(KKW) with FM 4 (1:3) in water. (b) Nonlinear least squares fitting of the emission intensity of peptide KKW at 362 nm to a 1:1 binding isotherm. The data correspond to entry 14 in Table 1.

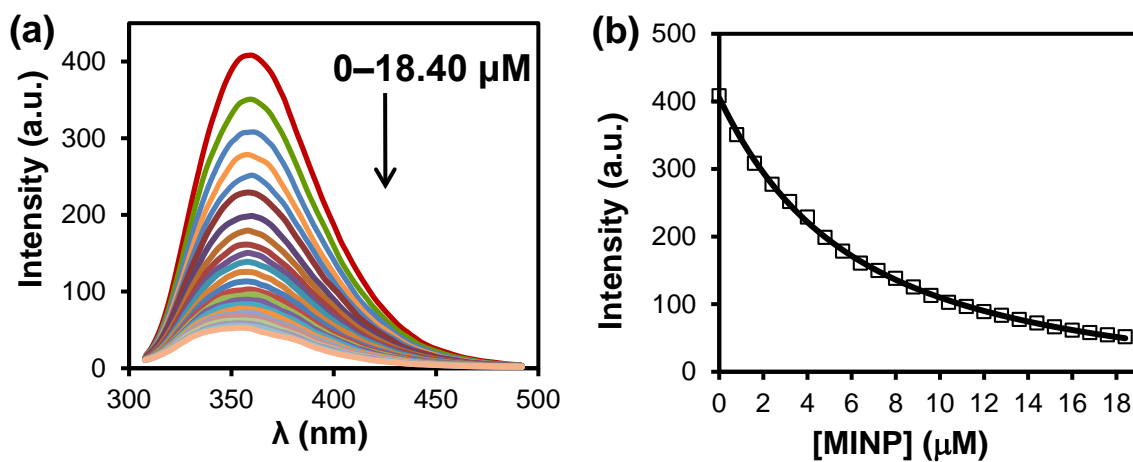

**Figure S22.** (a) Fluorescence emission spectra ( $\lambda_{\text{ex}} = 280 \text{ nm}$ ) of peptide WKK ( $2.0 \mu\text{M}$ ) upon addition of different concentrations of MINP(WKK) in water. (b) Nonlinear least squares fitting of the emission intensity of peptide WKK at 360 nm to a 1:1 binding isotherm. The data correspond to entry 15 in Table 1.

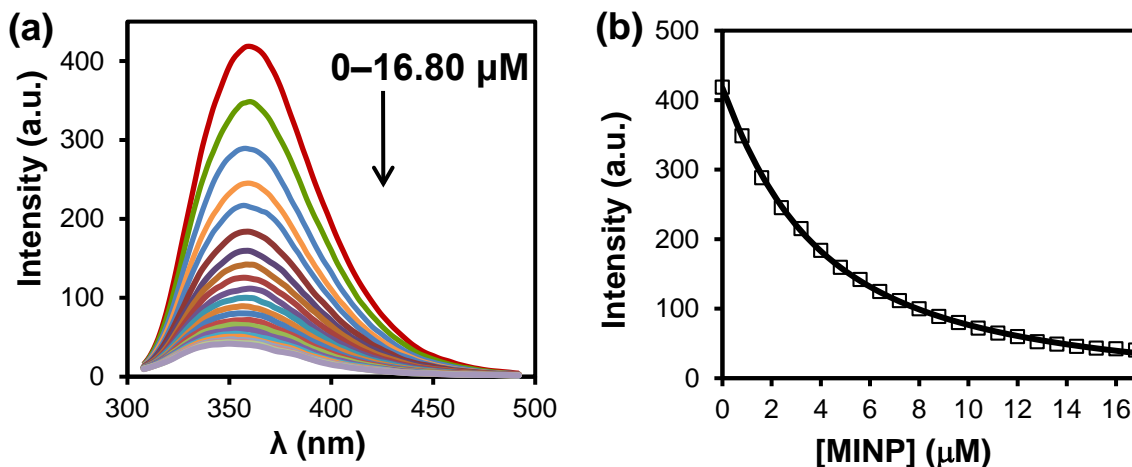

**Figure S23.** (a) Fluorescence emission spectra ( $\lambda_{\text{ex}} = 280 \text{ nm}$ ) of peptide WKK ( $2.0 \mu\text{M}$ ) upon addition of different concentrations of MINP(WKK) with FM 4 (1:3) in water. (b) Nonlinear least squares fitting of the emission intensity of peptide WKK at 360 nm to a 1:1 binding isotherm. The data correspond to entry 16 in Table 1.

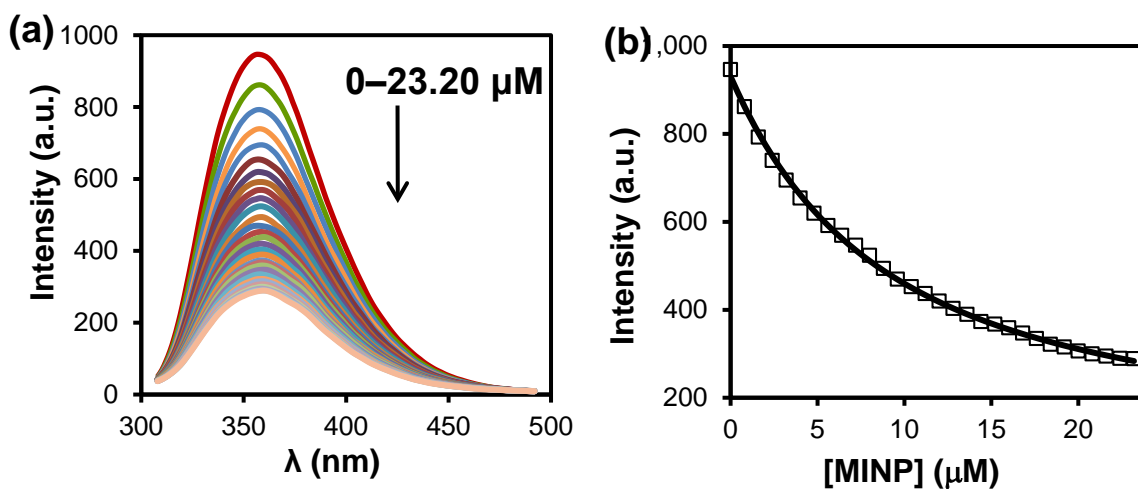

**Figure S24.** (a) Fluorescence emission spectra ( $\lambda_{\text{ex}} = 280 \text{ nm}$ ) of peptide KWK ( $2.0 \mu\text{M}$ ) upon addition of different concentrations of MINP(KWK) in water. (b) Nonlinear least squares fitting of the emission intensity of peptide KWK at 358 nm to a 1:1 binding isotherm. The data correspond to entry 17 in Table 1.



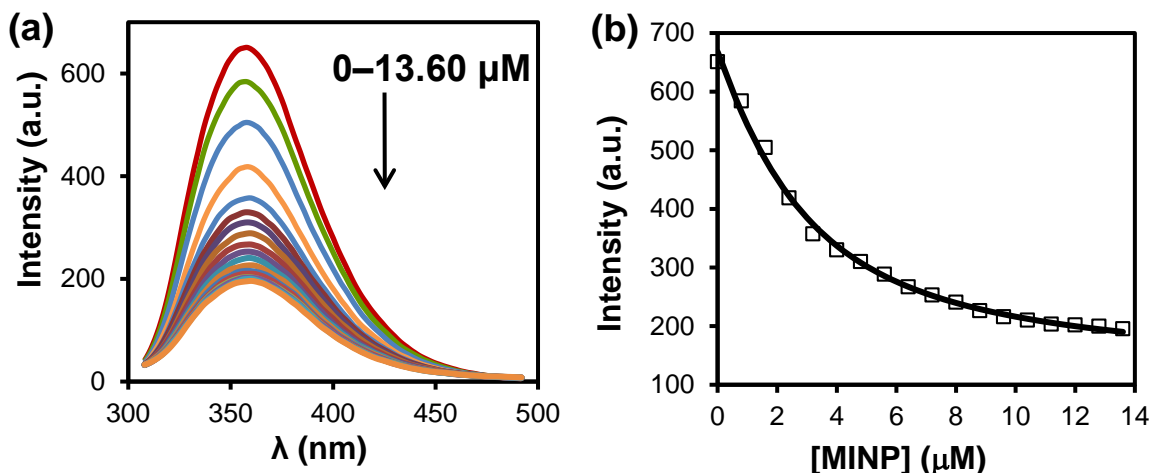

**Figure S25.** (a) Fluorescence emission spectra ( $\lambda_{\text{ex}} = 280 \text{ nm}$ ) of peptide KWK ( $2.0 \mu\text{M}$ ) upon addition of different concentrations of MINP(KWK) with FM 4 (1:3) in water. (b) Nonlinear least squares fitting of the emission intensity of peptide KWK at 358 nm to a 1:1 binding isotherm. The data correspond to entry 18 in Table 1.

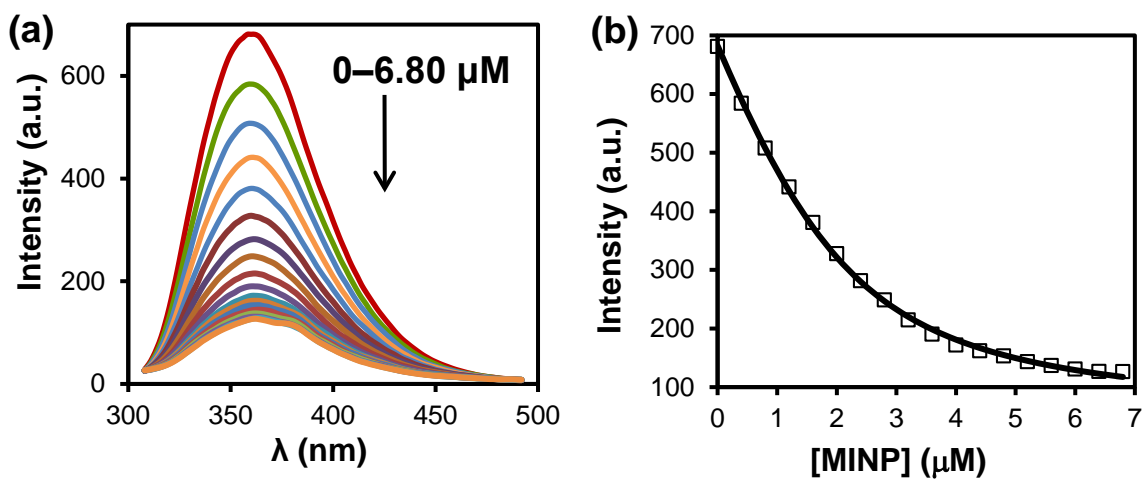

**Figure S26.** (a) Fluorescence emission spectra ( $\lambda_{\text{ex}} = 280 \text{ nm}$ ) of peptide RWW ( $2.0 \mu\text{M}$ ) upon addition of different concentrations of MINP(RWW) in water. (b) Nonlinear least squares fitting of the emission intensity of peptide RWW at 360 nm to a 1:1 binding isotherm. The data correspond to entry 19 in Table 1.

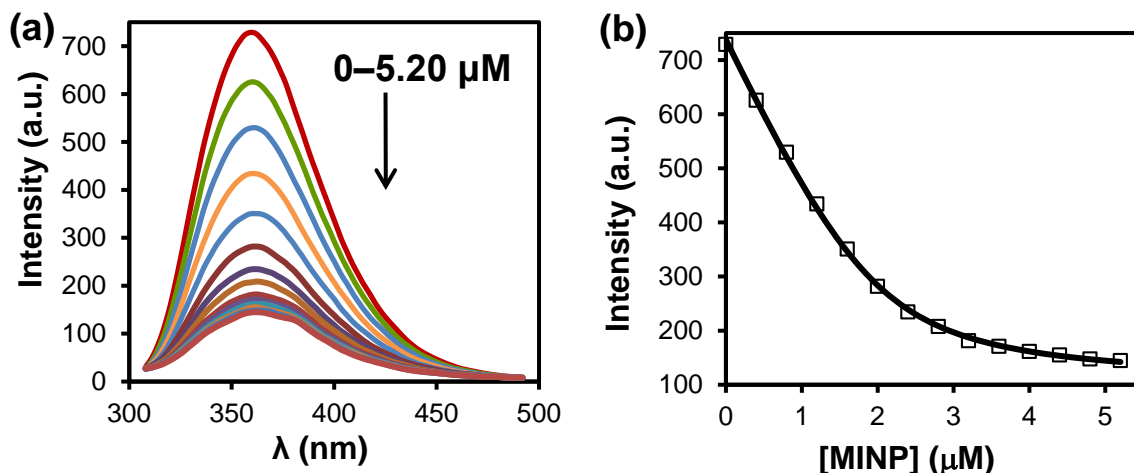

**Figure S27.** (a) Fluorescence emission spectra ( $\lambda_{\text{ex}} = 280 \text{ nm}$ ) of peptide RWW ( $2.0 \mu\text{M}$ ) upon addition of different concentrations of MINP(RWW) with FM 4 (1:2) in water. (b) Nonlinear least squares fitting of the emission intensity of peptide RWW at 360 nm to a 1:1 binding isotherm. The data correspond to entry 20 in Table 1.

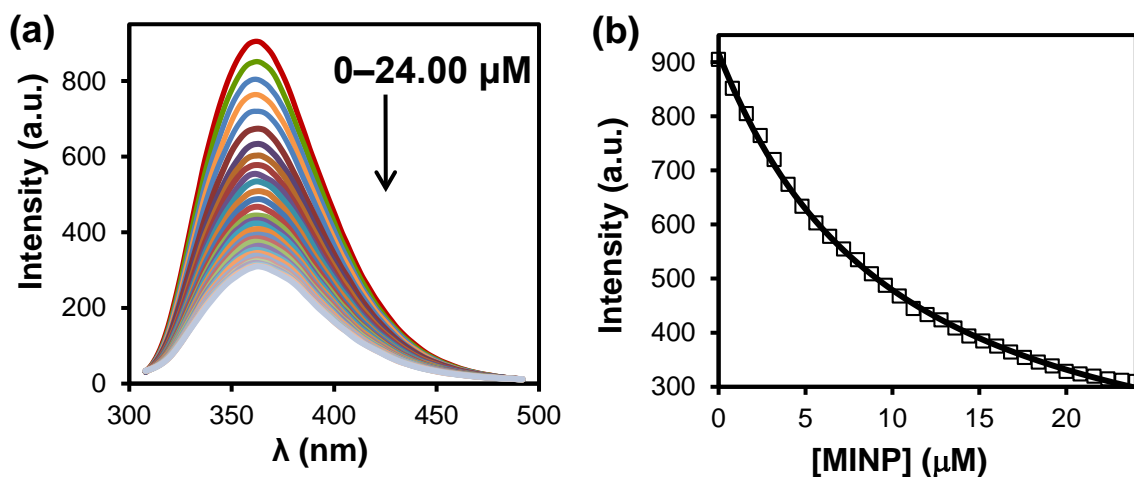

**Figure S28.** (a) Fluorescence emission spectra ( $\lambda_{\text{ex}} = 280 \text{ nm}$ ) of peptide RRW ( $2.0 \mu\text{M}$ ) upon addition of different concentrations of MINP(RRW) in water. (b) Nonlinear least squares fitting of the emission intensity of peptide RRW at 362 nm to a 1:1 binding isotherm. The data correspond to entry 21 in Table 1.

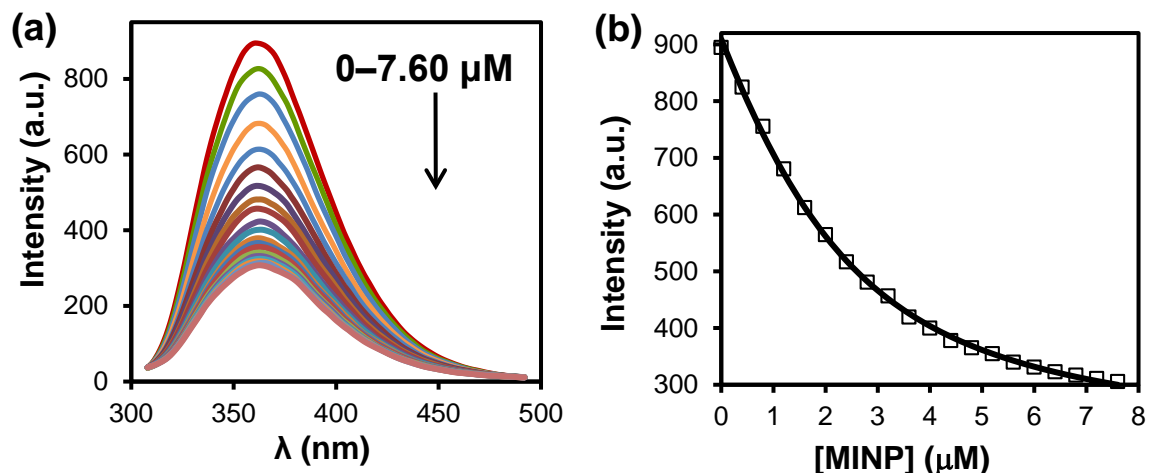

**Figure S29.** (a) Fluorescence emission spectra ( $\lambda_{\text{ex}} = 280 \text{ nm}$ ) of peptide RRW ( $2.0 \mu\text{M}$ ) upon addition of different concentrations of MINP(RRW) with FM 4 (1:3) in water. (b) Nonlinear least squares fitting of the emission intensity of peptide RRW at 362 nm to a 1:1 binding isotherm. The data correspond to entry 22 in Table 1.

**Table S1.** Binding selectivity of MINP(KWW) prepared without and with FM 4.<sup>a</sup>

| Entry | template | Guest | FM   | $K_a$<br>( $\times 10^5 \text{ M}^{-1}$ ) | $K_{\text{rel}}$ |
|-------|----------|-------|------|-------------------------------------------|------------------|
| 1     | KWW      | KWW   | none | $20.7 \pm 1.7$                            | 1                |
| 2     | KWW      | KSW   | none | $3.52 \pm 0.22$                           | 0.17             |
| 3     | KWW      | KKW   | none | $0.94 \pm 0.03$                           | 0.05             |
| 4     | KWW      | KWK   | none | $1.01 \pm 0.05$                           | 0.05             |
| 5     | KWW      | SWW   | none | $13.4 \pm 0.71$                           | 0.65             |
| 6     | KWW      | DWW   | none | $9.44 \pm 0.53$                           | 0.46             |
| 7     | KWW      | HWW   | none | $5.39 \pm 0.26$                           | 0.26             |
| 8     | KWW      | QWW   | none | $7.38 \pm 0.35$                           | 0.36             |
| 9     | KWW      | RWW   | none | $10.5 \pm 0.5$                            | 0.51             |
| 10    | KWW      | KWW   | 4    | $36.7 \pm 2.4$                            | 1                |
| 11    | KWW      | KSW   | 4    | $8.19 \pm 0.79$                           | 0.22             |
| 12    | KWW      | KKW   | 4    | $1.92 \pm 0.04$                           | 0.05             |
| 13    | KWW      | KWK   | 4    | $1.71 \pm 0.09$                           | 0.05             |
| 14    | KWW      | SWW   | 4    | $8.32 \pm 0.71$                           | 0.23             |
| 15    | KWW      | DWW   | 4    | $3.63 \pm 0.17$                           | 0.10             |
| 16    | KWW      | HWW   | 4    | $0.69 \pm 0.03$                           | 0.02             |
| 17    | KWW      | QWW   | 4    | $1.44 \pm 0.02$                           | 0.04             |
| 18    | KWW      | RWW   | 4    | $34.1 \pm 2.1$                            | 0.93             |

<sup>a</sup> The titrations were performed in Millipore water at 298 K. The  $K_a$  values are determined by fluorescence titration. The FM/amino group ratio was kept 1:1 in the cases with FM4.  $K_{\text{rel}}$  is the binding constant of other guests to that of KWW with the MINP prepared by KWW.

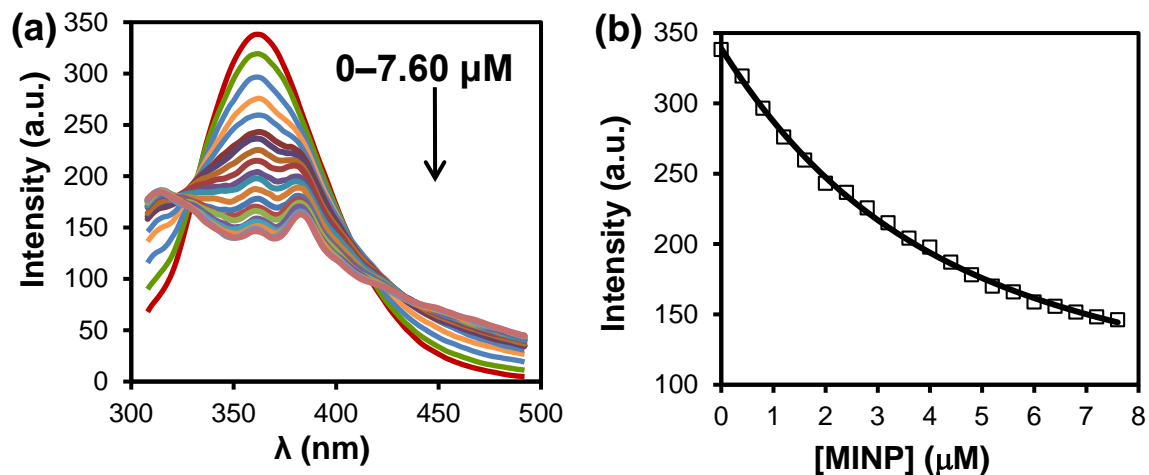

**Figure S30.** (a) Fluorescence emission spectra ( $\lambda_{\text{ex}} = 280 \text{ nm}$ ) of peptide KSW ( $2.0 \mu\text{M}$ ) upon addition of different concentrations of MINP(KWW) in water. (b) Nonlinear least squares fitting of the emission intensity of peptide KSW at  $362 \text{ nm}$  to a 1:1 binding isotherm. The data correspond to entry 2 in Table S1.

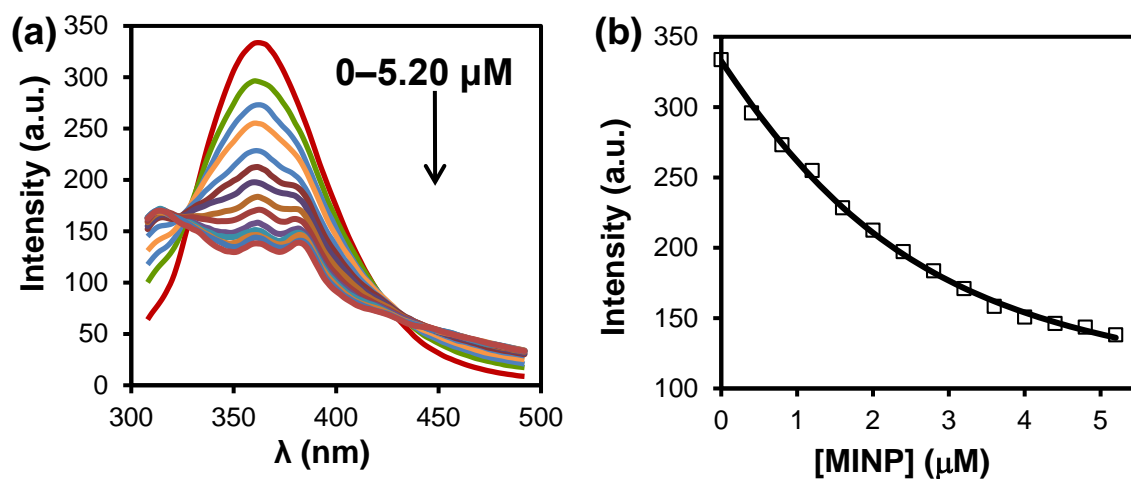

**Figure S31.** (a) Fluorescence emission spectra ( $\lambda_{\text{ex}} = 280 \text{ nm}$ ) of peptide KSW ( $2.0 \mu\text{M}$ ) upon addition of different concentrations of MINP(KWW) with FM 4 (1:2) in water. (b) Nonlinear least squares fitting of the emission intensity of peptide KSW at  $362 \text{ nm}$  to a 1:1 binding isotherm. The data correspond to entry 11 in Table S1.

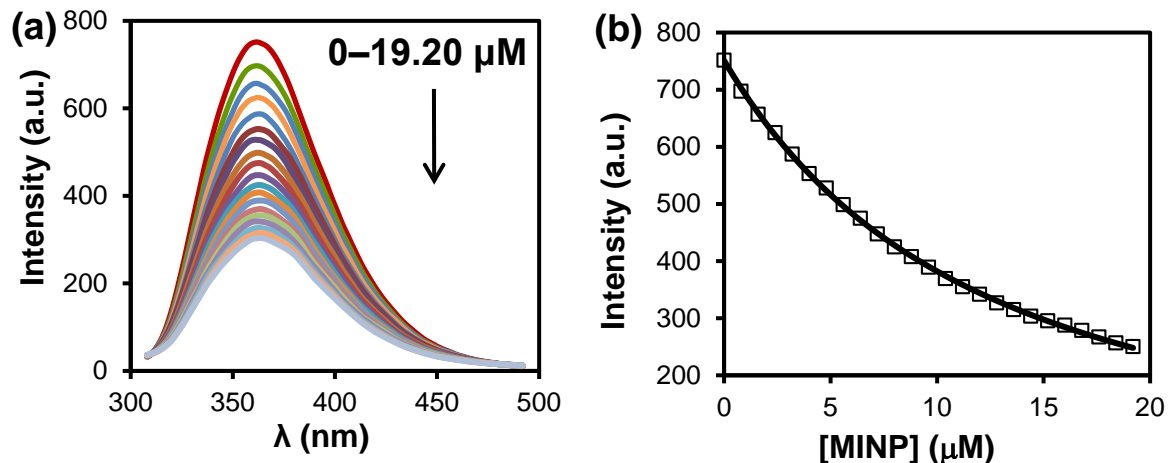

**Figure S32.** (a) Fluorescence emission spectra ( $\lambda_{\text{ex}} = 280 \text{ nm}$ ) of peptide KKW ( $2.0 \mu\text{M}$ ) upon addition of different concentrations of MINP(KWW) in water. (b) Nonlinear least squares fitting of the emission intensity of peptide KKW at  $362 \text{ nm}$  to a 1:1 binding isotherm. The data correspond to entry 3 in Table S1.

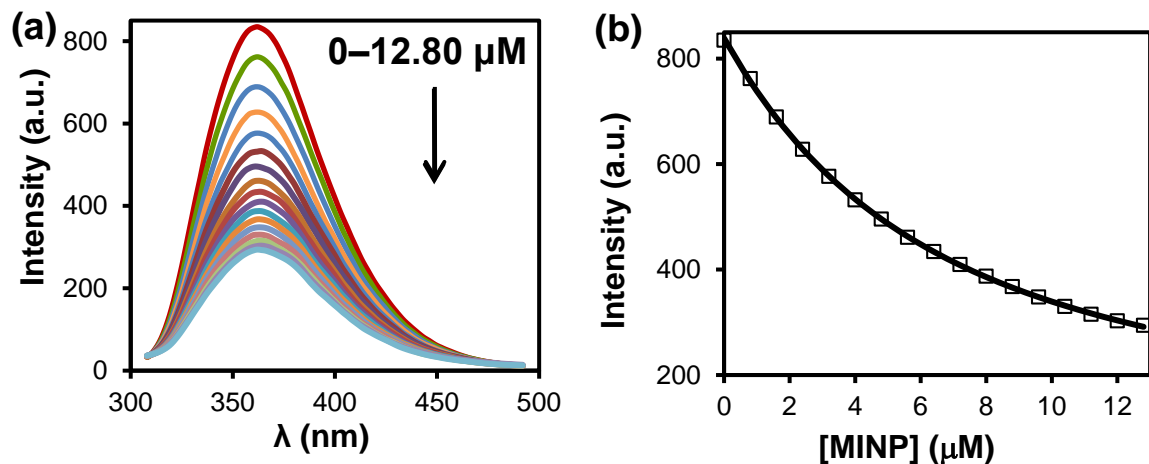

**Figure S33.** (a) Fluorescence emission spectra ( $\lambda_{\text{ex}} = 280 \text{ nm}$ ) of peptide KKW ( $2.0 \mu\text{M}$ ) upon addition of different concentrations of MINP(KWW) with FM 4 (1:2) in water. (b) Nonlinear least squares fitting of the emission intensity of peptide KKW at  $362 \text{ nm}$  to a 1:1 binding isotherm. The data correspond to entry 12 in Table S1.

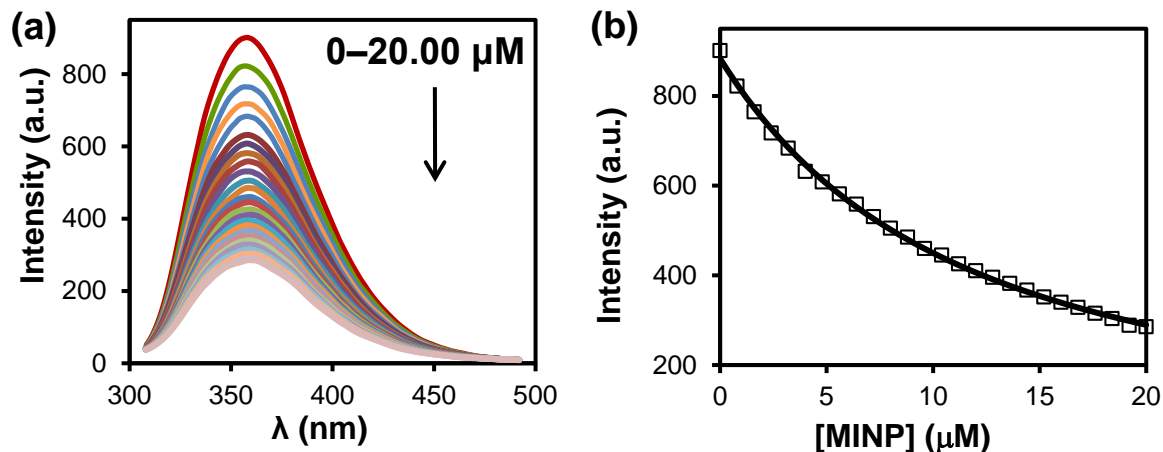

**Figure S34.** (a) Fluorescence emission spectra ( $\lambda_{\text{ex}} = 280 \text{ nm}$ ) of peptide KWK ( $2.0 \mu\text{M}$ ) upon addition of different concentrations of MINP(KWW) in water. (b) Nonlinear least squares fitting of the emission intensity of peptide KWK at 358 nm to a 1:1 binding isotherm. The data correspond to entry 4 in Table S1

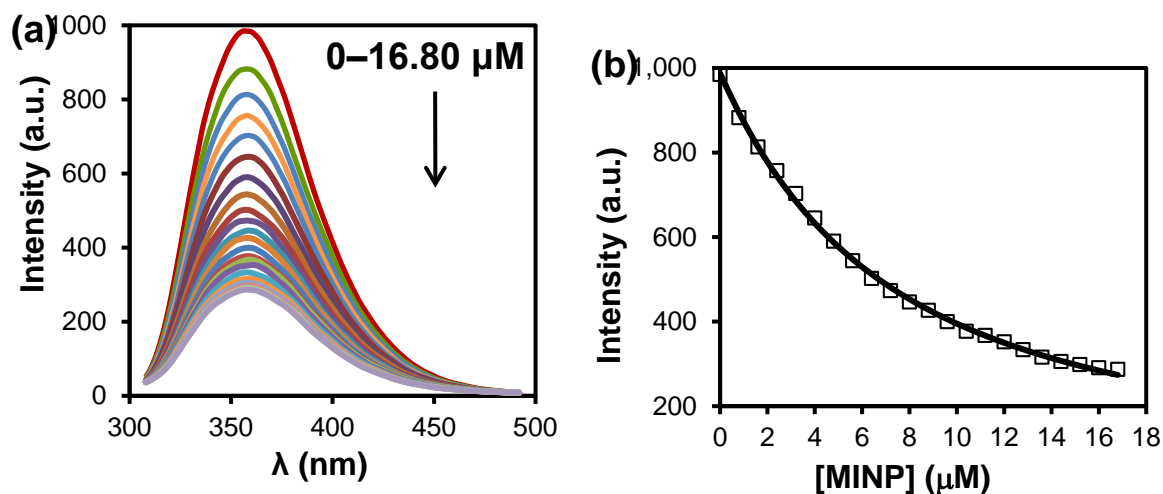

**Figure S35.** (a) Fluorescence emission spectra ( $\lambda_{\text{ex}} = 280 \text{ nm}$ ) of peptide KWK ( $2.0 \mu\text{M}$ ) upon addition of different concentrations of MINP(KWW) with FM 4 (1:2) in water. (b) Nonlinear least squares fitting of the emission intensity of peptide WNW at 358 nm to a 1:1 binding isotherm. The data correspond to entry 13 in Table S1.

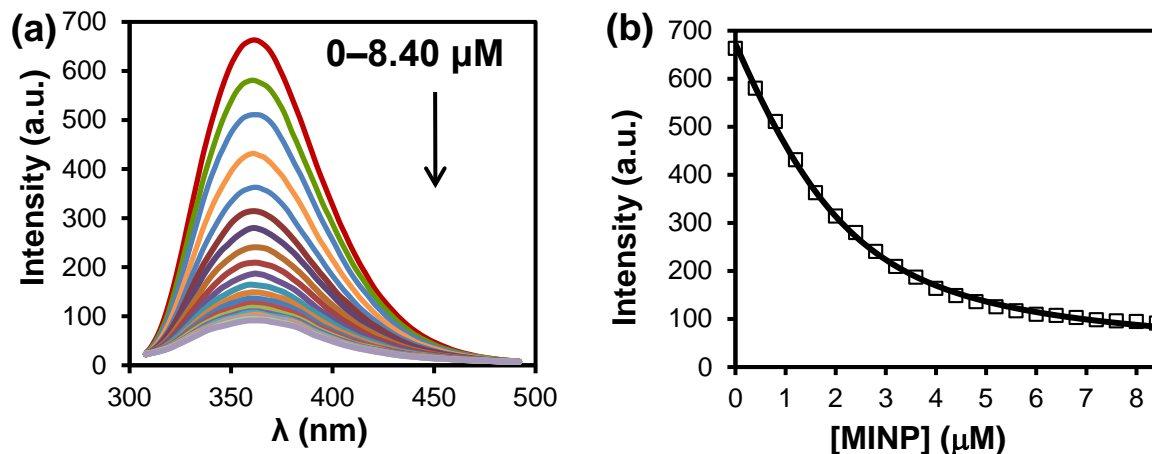

**Figure S36.** (a) Fluorescence emission spectra ( $\lambda_{\text{ex}} = 280 \text{ nm}$ ) of peptide SWW ( $2.0 \mu\text{M}$ ) upon addition of different concentrations of MINP(KWW) in water. (b) Nonlinear least squares fitting of the emission intensity of peptide SWW at  $362 \text{ nm}$  to a 1:1 binding isotherm. The data correspond to entry 5 in Table S1.

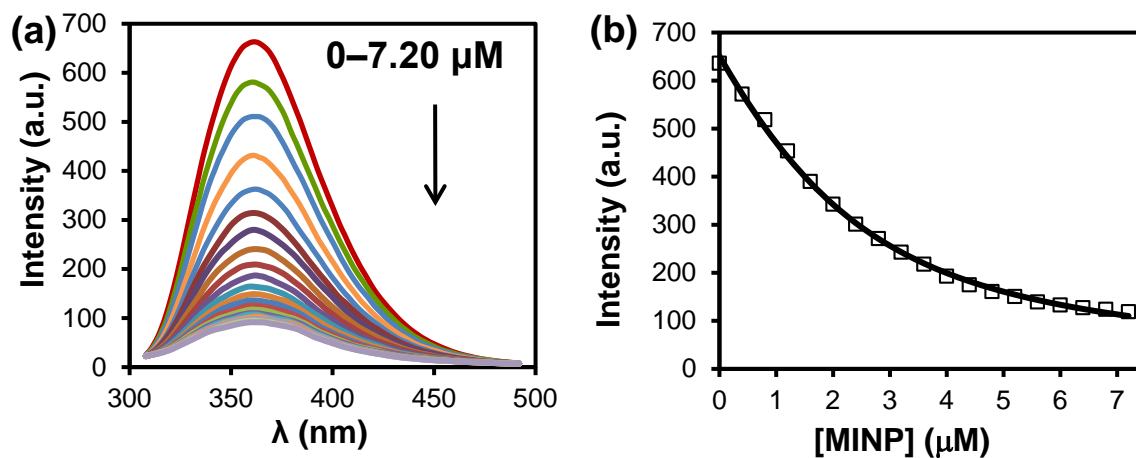

**Figure S37.** (a) Fluorescence emission spectra ( $\lambda_{\text{ex}} = 280 \text{ nm}$ ) of peptide SWW ( $2.0 \mu\text{M}$ ) upon addition of different concentrations of MINP(KWW) with FM 4 (1:2) in water. (b) Nonlinear least squares fitting of the emission intensity of peptide SWW at  $362 \text{ nm}$  to a 1:1 binding isotherm. The data correspond to entry 14 in Table S1.

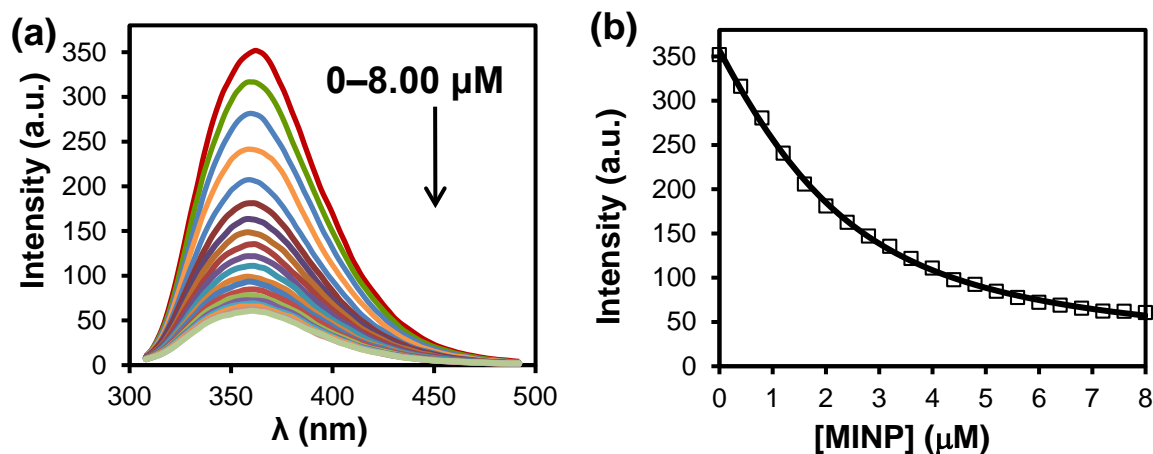

**Figure S38.** (a) Fluorescence emission spectra ( $\lambda_{\text{ex}} = 280 \text{ nm}$ ) of peptide DWW ( $2.0 \mu\text{M}$ ) upon addition of different concentrations of MINP(KWW) in water. (b) Nonlinear least squares fitting of the emission intensity of peptide DWW at  $362 \text{ nm}$  to a 1:1 binding isotherm. The data correspond to entry 6 in Table S1.

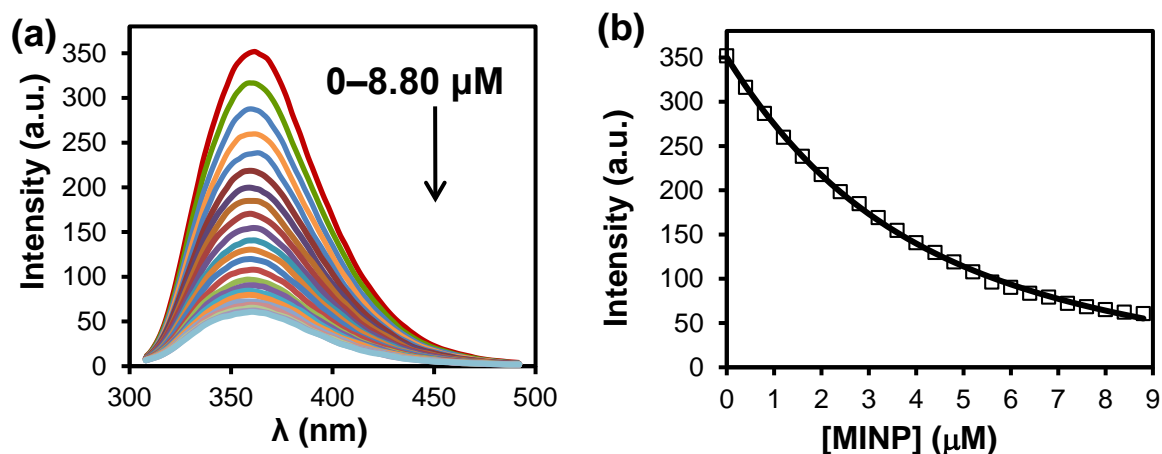

**Figure S39.** (a) Fluorescence emission spectra ( $\lambda_{\text{ex}} = 280 \text{ nm}$ ) of peptide DWW ( $2.0 \mu\text{M}$ ) upon addition of different concentrations of MINP(KWW) with FM 4 (1:2) in water. (b) Nonlinear least squares fitting of the emission intensity of peptide DWW at  $362 \text{ nm}$  to a 1:1 binding isotherm. The data correspond to entry 15 in Table S1.



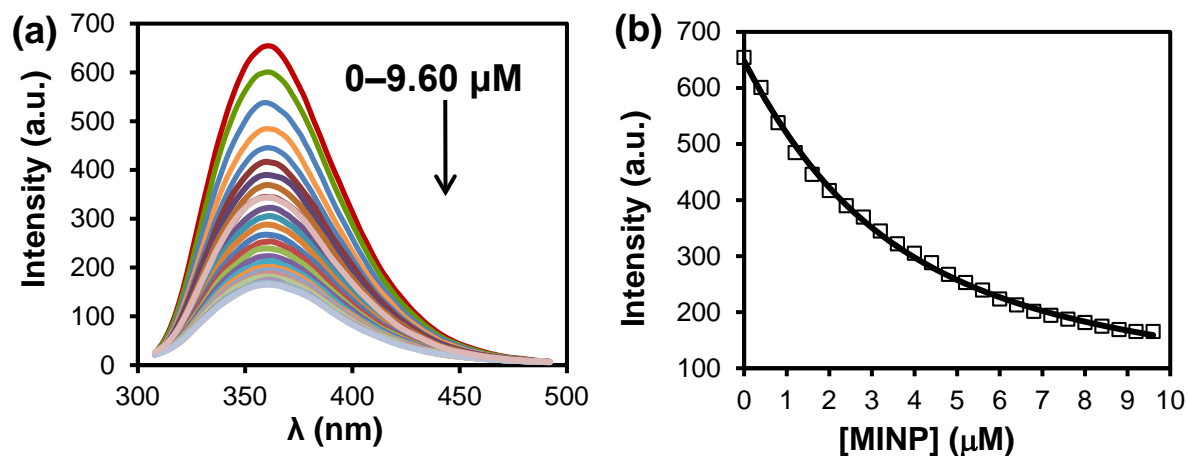

**Figure S40.** (a) Fluorescence emission spectra ( $\lambda_{\text{ex}} = 280 \text{ nm}$ ) of peptide HWW ( $2.0 \mu\text{M}$ ) upon addition of different concentrations of MINP(KWW) in water. (b) Nonlinear least squares fitting of the emission intensity of peptide HWW at  $360 \text{ nm}$  to a 1:1 binding isotherm. The data correspond to entry 7 in Table S1.

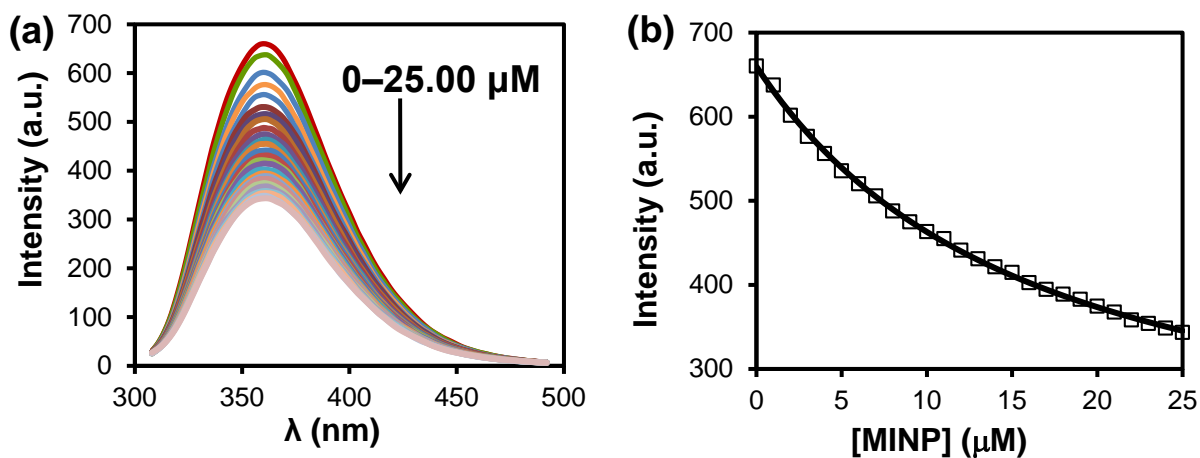

**Figure S41.** (a) Fluorescence emission spectra ( $\lambda_{\text{ex}} = 280 \text{ nm}$ ) of peptide HWW ( $2.0 \mu\text{M}$ ) upon addition of different concentrations of MINP(KWW) with FM 4 (1:2) in water. (b) Nonlinear least squares fitting of the emission intensity of peptide HWW at  $360 \text{ nm}$  to a 1:1 binding isotherm. The data correspond to entry 16 in Table S1.

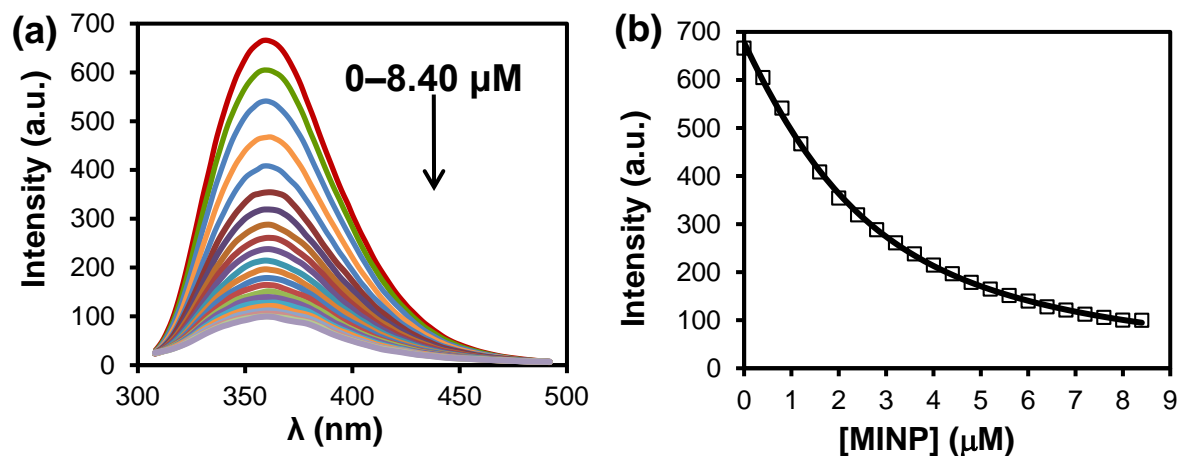

**Figure S42.** (a) Fluorescence emission spectra ( $\lambda_{\text{ex}} = 280 \text{ nm}$ ) of peptide QWW ( $2.0 \mu\text{M}$ ) upon addition of different concentrations of MINP(KWW) in water. (b) Nonlinear least squares fitting of the emission intensity of peptide QWW at 360 nm to a 1:1 binding isotherm. The data correspond to entry 8 in Table S1.

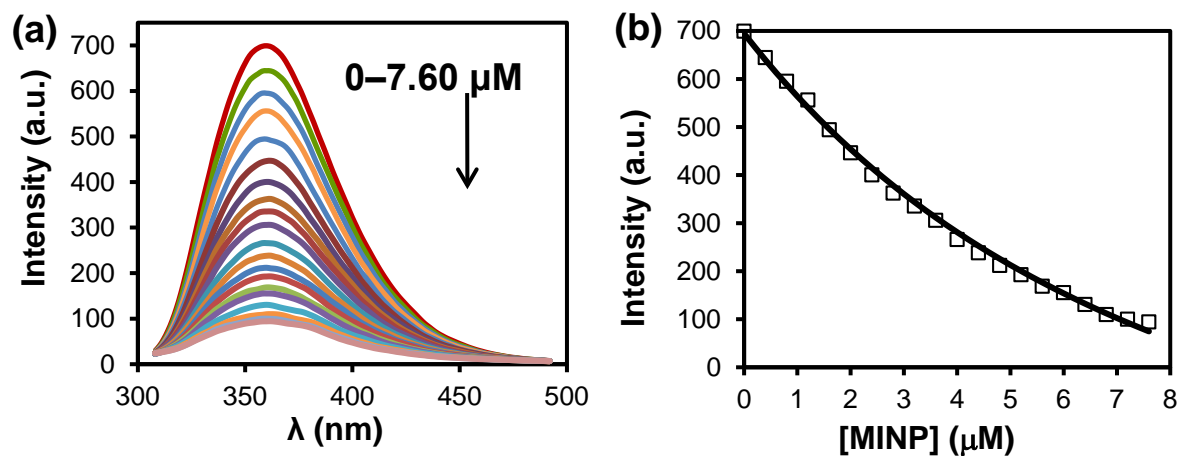

**Figure S43.** (a) Fluorescence emission spectra ( $\lambda_{\text{ex}} = 280 \text{ nm}$ ) of peptide QWW ( $2.0 \mu\text{M}$ ) upon addition of different concentrations of MINP(KWW) with FM 4 (1:2) in water. (b) Nonlinear least squares fitting of the emission intensity of peptide QWW at 360 nm to a 1:1 binding isotherm. The data correspond to entry 17 in Table S1.

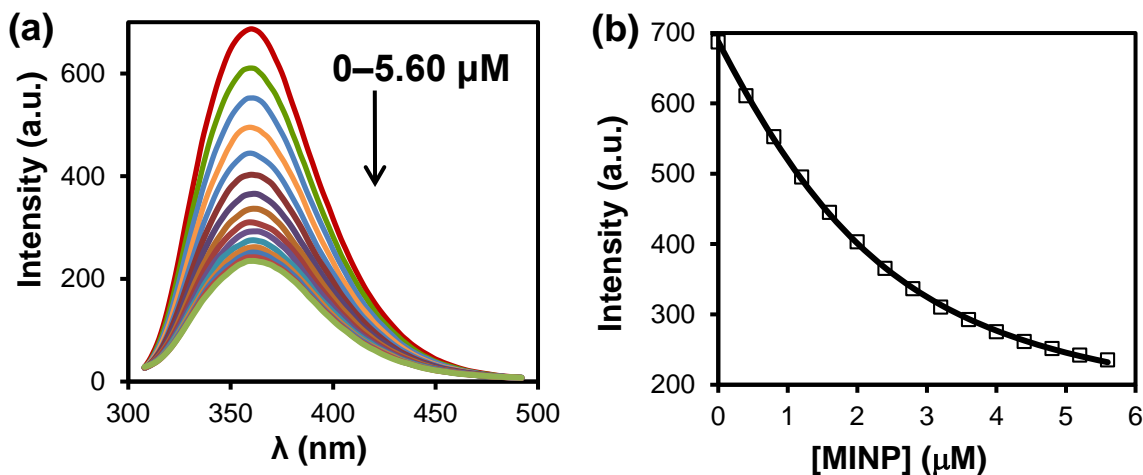

**Figure S44.** (a) Fluorescence emission spectra ( $\lambda_{\text{ex}} = 280 \text{ nm}$ ) of peptide RWW ( $2.0 \mu\text{M}$ ) upon addition of different concentrations of MINP(KWW) in water. (b) Nonlinear least squares fitting of the emission intensity of peptide RWW at 360 nm to a 1:1 binding isotherm. The data correspond to entry 9 in Table S1.

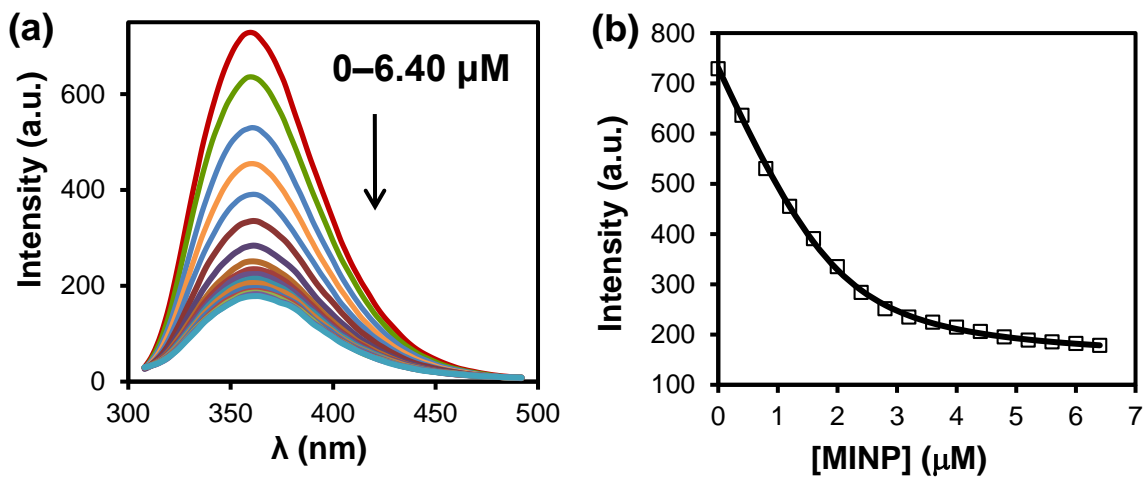

**Figure S45.** (a) Fluorescence emission spectra ( $\lambda_{\text{ex}} = 280 \text{ nm}$ ) of peptide RWW ( $2.0 \mu\text{M}$ ) upon addition of different concentrations of MINP(KWW) with FM 4 (1:2) in water. (b) Nonlinear least squares fitting of the emission intensity of peptide RWW at 360 nm to a 1:1 binding isotherm. The data correspond to entry 18 in Table S1.

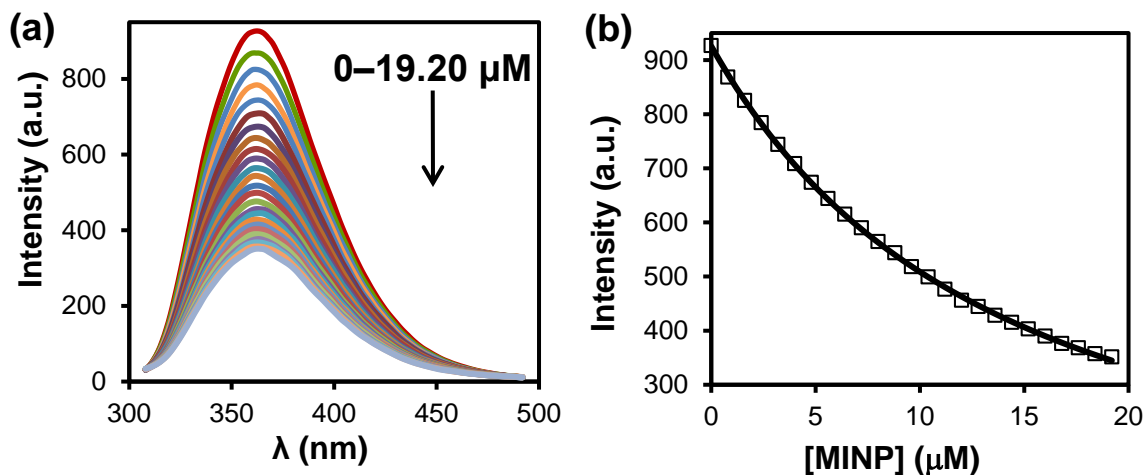

**Figure S46.** (a) Fluorescence emission spectra ( $\lambda_{\text{ex}} = 280 \text{ nm}$ ) of peptide RRW ( $2.0 \mu\text{M}$ ) upon addition of different concentrations of MINP(KKW) in water. (b) Nonlinear least squares fitting of the emission intensity of peptide RRW at 362 nm to a 1:1 binding isotherm. The data correspond to entry 2 in Table 3.

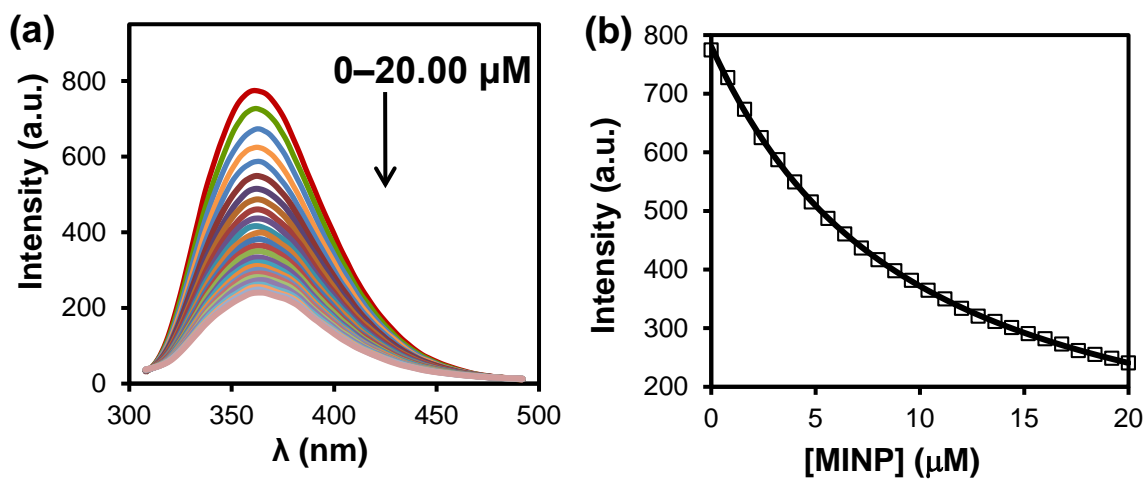

**Figure S47.** (a) Fluorescence emission spectra ( $\lambda_{\text{ex}} = 280 \text{ nm}$ ) of peptide KKW ( $2.0 \mu\text{M}$ ) upon addition of different concentrations of MINP(RRW) in water. (b) Nonlinear least squares fitting of the emission intensity of peptide KKW at 362 nm to a 1:1 binding isotherm. The data correspond to entry 4 in Table 2.

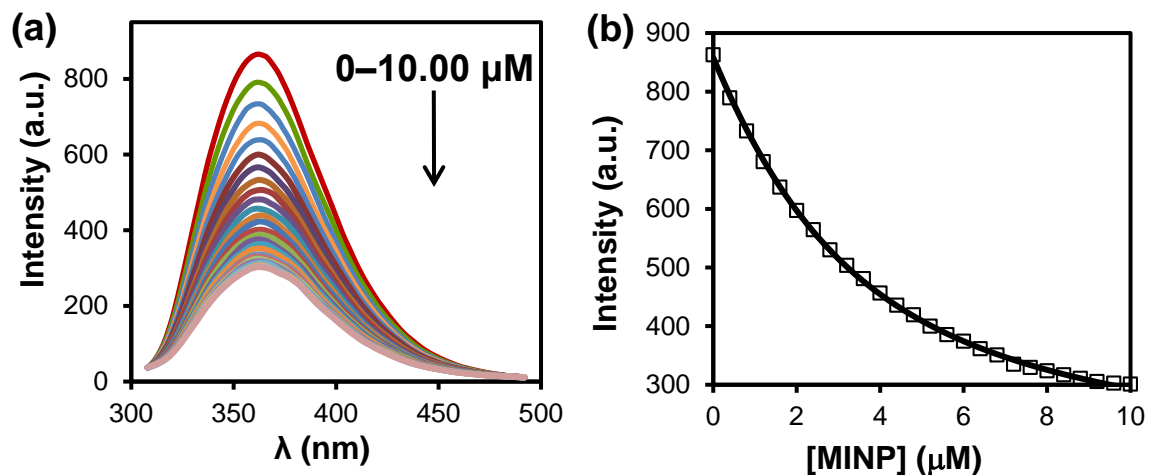

**Figure S48.** (a) Fluorescence emission spectra ( $\lambda_{\text{ex}} = 280 \text{ nm}$ ) of peptide RRW ( $2.0 \mu\text{M}$ ) upon addition of different concentrations of MINP(KKW) with FM 4 (1:3). (b) Nonlinear least squares fitting of the emission intensity of peptide RRW at 362 nm to a 1:1 binding isotherm. The data correspond to entry 6 in Table 2.

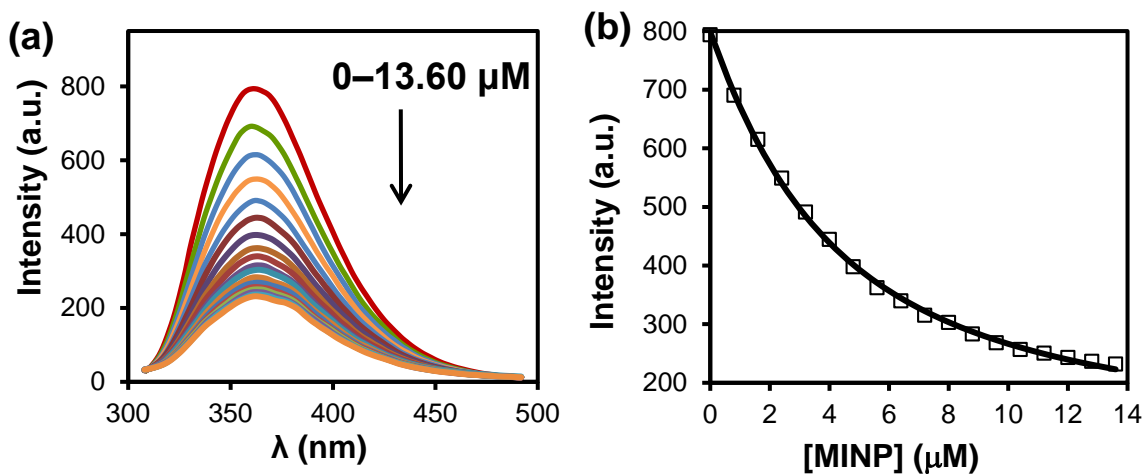

**Figure S49.** (a) Fluorescence emission spectra ( $\lambda_{\text{ex}} = 280 \text{ nm}$ ) of peptide KKW ( $2.0 \mu\text{M}$ ) upon addition of different concentrations of MINP(RRW) with FM 4 (1:3). (b) Nonlinear least squares fitting of the emission intensity of peptide KKW at 362 nm to a 1:1 binding isotherm. The data correspond to entry 8 in Table 2.

## ITC titration experiments

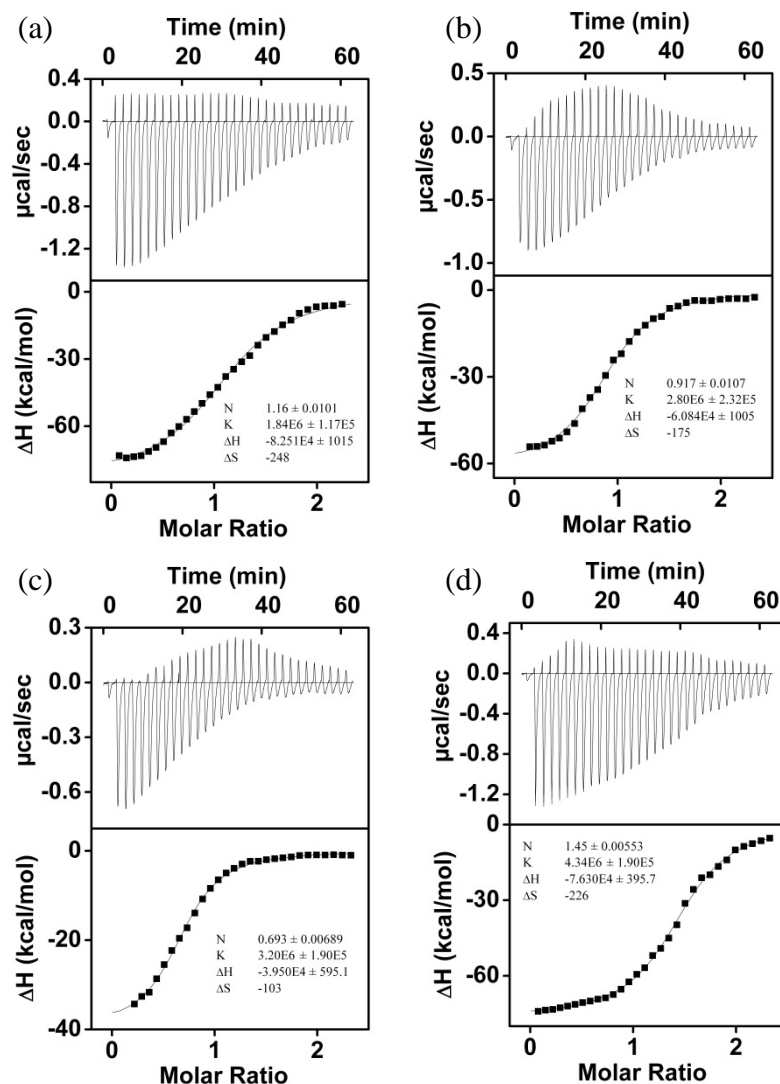

**Figure S50.** ITC titration curves obtained at 298 K for the titration of 5  $\mu\text{M}$  of (a) MINP(KWW) without FM, (b) MINP(KWW) with FM 4 (1:1), (c) MINP(KWW) with FM 4 (1:2) and (d) MINP(KWW) with FM 4 (1:3) by peptide KWW (50  $\mu\text{M}$ ) in Millipore water.

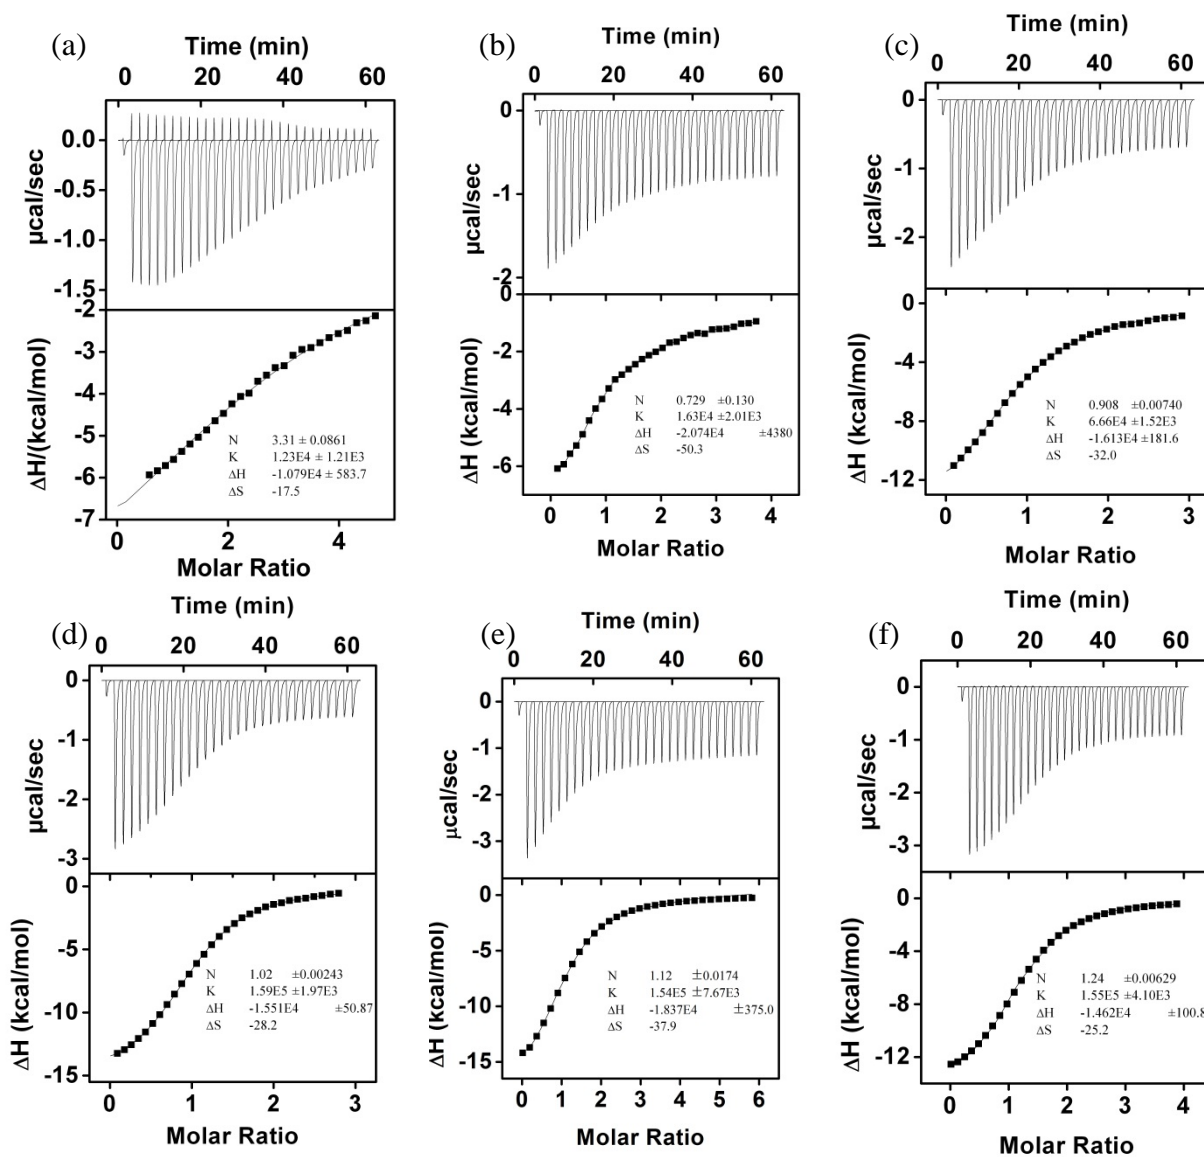

**Figure S51.** ITC titration curves obtained at 298 K for the titration of (a) MINP(KKK) without FM, (b) MINP(KKK) with FM 4 (1:2), (c) MINP(KKK) with FM 4 (1:3), (d) MINP(KKK) with FM 4 (1:4), (e) MINP(KKK) with FM 4 (1:5), and (f) MINP(KKK) with FM 4 (1:6) by peptide KKK in Millipore water. The concentration of MINP in all cases is 40  $\mu\text{M}$ . The guest concentrations are (a) 800  $\mu\text{M}$ , (b) 640  $\mu\text{M}$  and (c) 500  $\mu\text{M}$ , (d) 480  $\mu\text{M}$ , (e) 1000  $\mu\text{M}$  and (f) 670  $\mu\text{M}$ , respectively. The data correspond to entries 5, 6, 7, 8, 9 10 in Table 1, respectively.

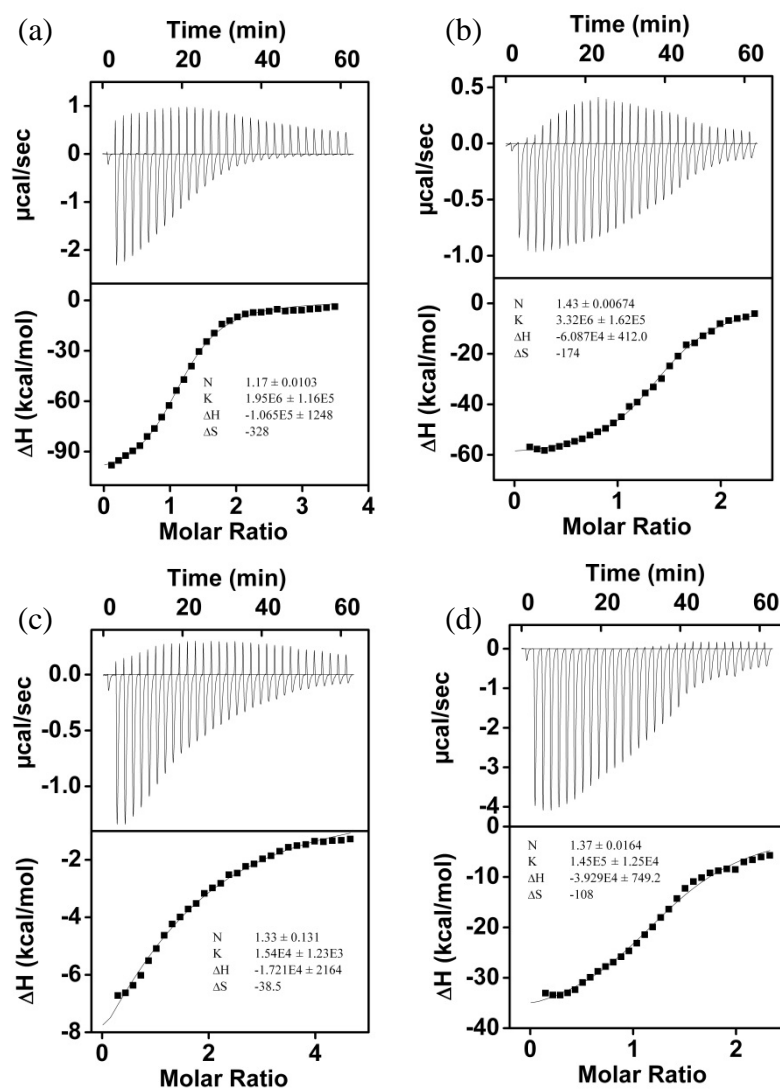

**Figure S52.** ITC titration curves obtained at 298 K for the titration of (a) MINP(KWW) without FM (5  $\mu\text{M}$ ) by peptide KWW (75  $\mu\text{M}$ ), (b) MINP(KWW) with FM 4 (1:2) (5  $\mu\text{M}$ ) by peptide KWW (50  $\mu\text{M}$ ), (c) MINP(KKK) without FM (40  $\mu\text{M}$ ) by peptide KKK (800  $\mu\text{M}$ ) and (d) MINP(KKK) with FM 4 (1:4) (40  $\mu\text{M}$ ) by peptide KKK (400  $\mu\text{M}$ ) in 25 mM HEPES buffer (pH 7.4).



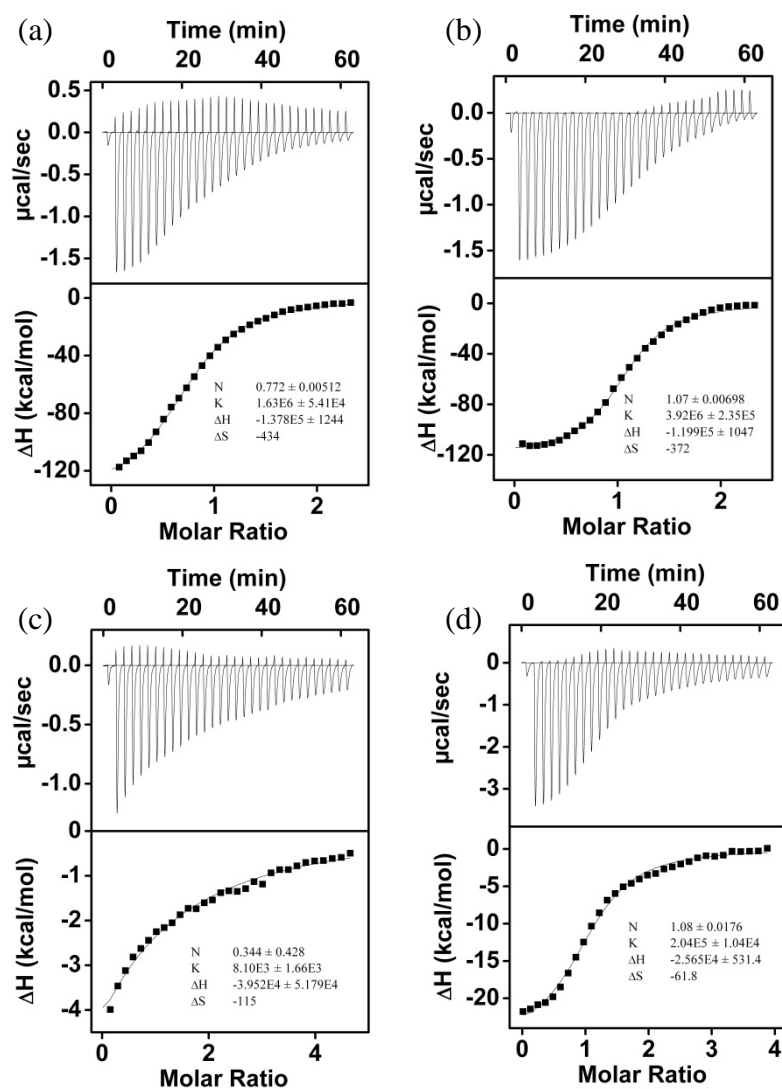

**Figure S53.** ITC titration curves obtained at 298 K for the titration of (a) MINP(KWW) without FM (5  $\mu$ M) by peptide KWW (50  $\mu$ M), (b) MINP(KWW) with FM 4 (1:2) (5 $\mu$ M) by peptide KWW (50  $\mu$ M), (c) MINP(KKK) without FM (40  $\mu$ M) by peptide KKK (800  $\mu$ M) and (d) MINP(KKK) with FM 4 (1:4) (30  $\mu$ M) by peptide KKK (500  $\mu$ M) in 25 mM HEPES buffer (pH 4.7).

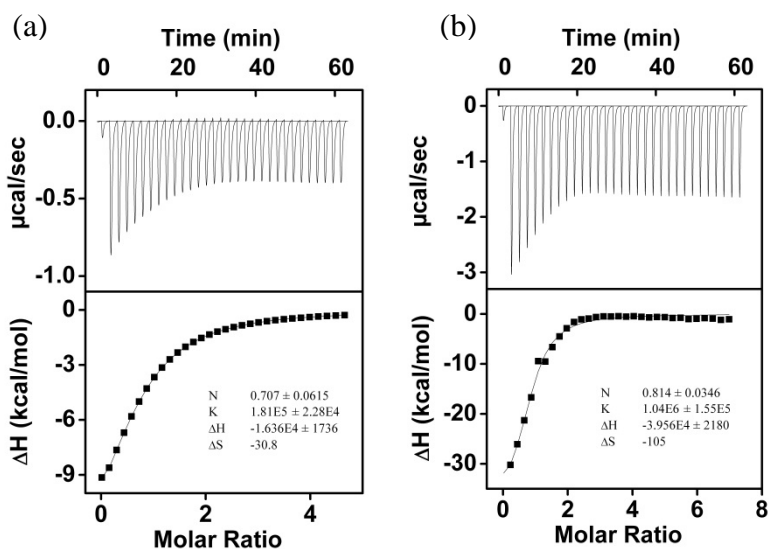

**Figure S54.** ITC titration curves obtained at 298 K for the titration of (a) MINP(PKKKRKV) without FM (10  $\mu\text{M}$ ) and (b) MINP(PKKKRKV) with FM 4 (1:6) (5 $\mu\text{M}$ ) by peptide PKKKRKV in Millipore water. The guest concentrations are (a) 200  $\mu\text{M}$  and (b) 150  $\mu\text{M}$ , respectively.

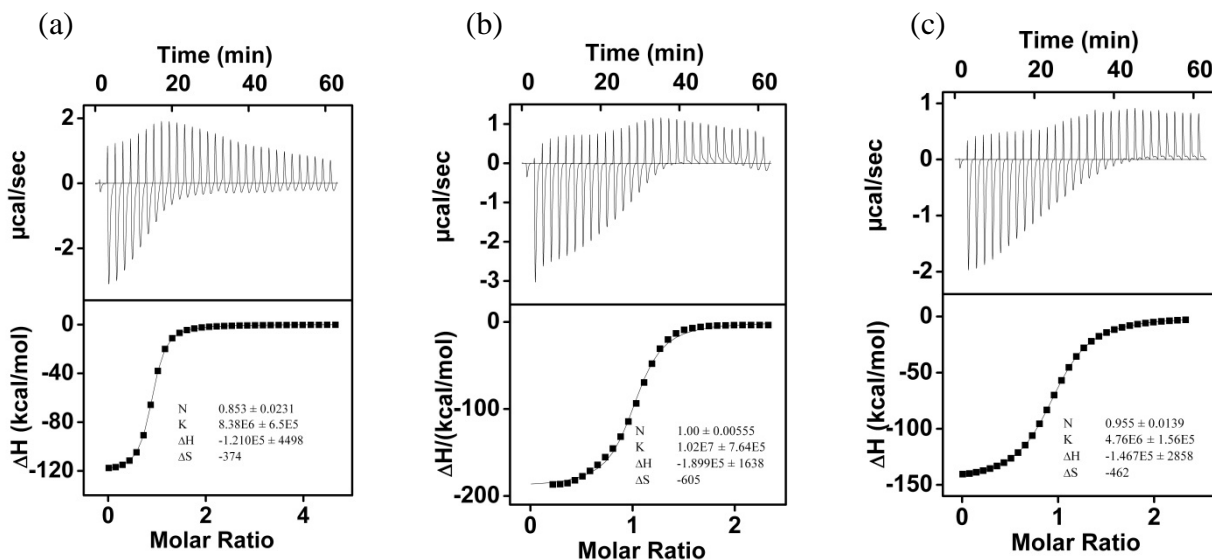

**Figure S55.** ITC titration curves obtained at 298 K for the titration of 5.0  $\mu\text{M}$  of (a) MINP(KKALRRQETVDAL) with FM 4 (1:5) by peptide KKALRRQETVDAL (100  $\mu\text{M}$ ), (b) MINP(RVLSFIKGTK) with FM 4 (1:4) by peptide RVLSFIKGTK (50  $\mu\text{M}$ ) and (c) MINP(LRRASLG) with FM 4 (1:3) by peptide LRRASLG (50  $\mu\text{M}$ ) in Millipore water.
